# Supplementary material for: Cerebral Organoids Derived from a Parkinson’s Patient Exhibit Unique Pathogenesis from Chikungunya Virus Infection When Compared to a Non-Parkinson’s Patient
Source: MDPI journal article supplement (doi:10.3390/pathogens10070913), 2021-07-20
Supplement: s1 [file s1]

**Table S1.** Gene expression data and analysis for non-PD organoids and non-PD organoids infected with CHIKV obtained 14 days post inoculation. UDT: undetermined

|         | Non-PD | DCt     | non-PD-CHIK<br>V | DCt     | DDCt   | fold<br>change | log fold<br>change |
|---------|--------|---------|------------------|---------|--------|----------------|--------------------|
| Gene ID | raw CT |         | raw CT           |         |        |                |                    |
| 18S     | 4.024  |         | 24.588           |         |        |                |                    |
| GUSB    | 22.349 |         | 25.140           |         |        |                |                    |
| HPRT1   | 21.835 |         | 30.495           |         |        |                |                    |
| GAPDH   | 16.749 |         | 31.949           |         |        |                |                    |
| ABAT    | 22.019 | 0.330   | 27.031           | -1.891  | 2.221  | 0.215          | -2.221             |
| ACHE    | 25.873 | -3.523  | 34.739           | -9.599  | 6.075  | 0.015          | -6.075             |
| BSN     | 27.771 | -5.421  | 34.371           | -9.231  | 3.809  | 0.071          | -3.809             |
| CHAT    | 31.140 | -8.790  | 35.035           | -9.894  | 1.104  | 0.465          | -1.104             |
| CHRM1   | 30.327 | -7.978  | 32.839           | -7.699  | -0.279 | 1.214          | 0.279              |
| CHRM2   | 26.637 | -4.287  | 29.489           | -4.348  | 0.061  | 0.959          | -0.061             |
| CHRM3   | 24.891 | -2.541  | 32.225           | -7.085  | 4.543  | 0.043          | -4.543             |
| CHRM4   | 25.924 | -3.574  | 29.612           | -4.472  | 0.898  | 0.537          | -0.898             |
| CHRM5   | 28.195 | -5.845  | 33.284           | -8.144  | 2.299  | 0.203          | -2.299             |
| CHRNA2  | 31.187 | -8.838  | 36.352           | -11.212 | 2.374  | 0.193          | -2.374             |
| CHRNA3  | 27.334 | -4.985  | 33.317           | -8.177  | 3.192  | 0.109          | -3.192             |
| CHRNA4  | 28.765 | -6.416  | 32.343           | -7.202  | 0.786  | 0.580          | -0.786             |
| CHRNA5  | 27.223 | -4.874  | 32.583           | -7.443  | 2.569  | 0.169          | -2.569             |
| CHRNA6  | 28.147 | -5.797  | 35.831           | -10.691 | 4.894  | 0.034          | -4.894             |
| CHRNA2  | 27.406 | -5.056  | 31.301           | -6.161  | 1.104  | 0.465          | -1.104             |
| CHRNA3  | 28.456 | -6.107  | 34.776           | -9.636  | 3.530  | 0.087          | -3.530             |
| CHRNA4  | 25.612 | -3.263  | 29.826           | -4.686  | 1.423  | 0.373          | -1.423             |
| CHRNA5  | 30.959 | -8.610  | 41.000           | -15.860 | 7.250  | 0.007          | -7.250             |
| CHRNA6  | 28.223 | -5.874  | 41.000           | -15.860 | 9.986  | 0.001          | -9.986             |
| COMT    | 21.685 | 0.664   | 32.018           | -6.878  | 7.542  | 0.005          | -7.542             |
| CPLX1   | 27.547 | -5.198  | 35.586           | -10.446 | 5.248  | 0.026          | -5.248             |
| DRD2    | 25.649 | -3.300  | 32.949           | -7.809  | 4.509  | 0.044          | -4.509             |
| DRD3    | 36.286 | -13.937 | 41.000           | -15.860 | 1.923  | 0.264          | -1.923             |
| GABBR1  | 22.526 | -0.177  | 25.539           | -0.399  | 0.222  | 0.857          | -0.222             |
| GABRA1  | 29.916 | -7.566  | 32.633           | -7.493  | -0.074 | 1.052          | 0.074              |
| GABRA2  | 33.256 | -10.907 | 41.000           | -15.860 | 4.953  | 0.032          | -4.953             |
| GABRA4  | 33.197 | -10.847 | 41.000           | -15.860 | 5.012  | 0.031          | -5.012             |
| GABRA5  | 28.907 | -6.558  | 31.817           | -6.677  | 0.119  | 0.921          | -0.119             |

|         |        |             |        |         |        |        |         |
|---------|--------|-------------|--------|---------|--------|--------|---------|
| GABRA6  | 36.795 | -14.44<br>6 | 37.234 | -12.093 | -2.352 | 5.107  | 2.352   |
| GABRB1  | 27.857 | -5.507      | 33.106 | -7.965  | 2.458  | 0.182  | -2.458  |
| GABRB2  | 26.008 | -3.659      | 30.907 | -5.767  | 2.108  | 0.232  | -2.108  |
| GABRB3  | 24.540 | -2.190      | 30.370 | -5.229  | 3.039  | 0.122  | -3.039  |
| GABRD   | 29.867 | -7.518      | 41.000 | -15.860 | 8.342  | 0.003  | -8.342  |
| GABRE   | 26.860 | -4.511      | 31.874 | -6.734  | 2.222  | 0.214  | -2.222  |
| GABRG1  | 31.466 | -9.117      | 33.935 | -8.795  | -0.322 | 1.250  | 0.322   |
| GABRG2  | 27.734 | -5.385      | 29.373 | -4.233  | -1.153 | 2.223  | 1.153   |
| GABRG3  | 29.898 | -7.548      | 31.249 | -6.109  | -1.439 | 2.712  | 1.439   |
| GABRP   | 19.753 | 2.596       | 35.749 | -10.609 | 13.205 | 0.000  | -13.205 |
| GABRQ   | 26.148 | -3.799      | 32.232 | -7.092  | 3.293  | 0.102  | -3.293  |
| GABRR1  | 31.249 | -8.899      | 41.000 | -15.860 | 6.960  | 0.008  | -6.960  |
| GABRR2  | 28.487 | -6.138      | 41.000 | -15.860 | 9.722  | 0.001  | -9.722  |
| GAD1    | 26.516 | -4.167      | 27.882 | -2.742  | -1.425 | 2.686  | 1.425   |
| GCH1    | 27.301 | -4.952      | 35.797 | -10.656 | 5.704  | 0.019  | -5.704  |
| GLRA1   | 29.351 | -7.001      | 33.316 | -8.175  | 1.174  | 0.443  | -1.174  |
| GLRA2   | 29.577 | -7.228      | 31.837 | -6.697  | -0.531 | 1.445  | 0.531   |
| GLRA3   | 31.454 | -9.104      | 32.149 | -7.009  | -2.095 | 4.273  | 2.095   |
| GLRB    | 25.426 | -3.077      | 30.637 | -5.497  | 2.420  | 0.187  | -2.420  |
| GRIA1   | 27.155 | -4.806      | 27.578 | -2.438  | -2.368 | 5.162  | 2.368   |
| GRIK4   | 30.909 | -8.560      | 34.203 | -9.063  | 0.503  | 0.706  | -0.503  |
| HTR1B   | 25.922 | -3.572      | 30.177 | -5.036  | 1.464  | 0.363  | -1.464  |
| HTR1E   | 25.996 | -3.646      | 31.765 | -6.624  | 2.978  | 0.127  | -2.978  |
| HTR2A   | 27.635 | -5.286      | 32.851 | -7.711  | 2.425  | 0.186  | -2.425  |
| HTR3A   | 32.637 | -10.28<br>8 | 35.926 | -10.786 | 0.498  | 0.708  | -0.498  |
| HTR3B   | 39.939 | -17.59<br>0 | 36.209 | -11.068 | -6.522 | 91.881 | 6.522   |
| HTR7    | 28.161 | -5.811      | 41.000 | -15.860 | 10.048 | 0.001  | -10.048 |
| MAOA    | 20.656 | 1.694       | 34.164 | -9.024  | 10.718 | 0.001  | -10.718 |
| PHOX2A  | 29.938 | -7.588      | 41.000 | -15.860 | 8.271  | 0.003  | -8.271  |
| RIMS1   | 29.683 | -7.334      | 37.947 | -12.807 | 5.473  | 0.023  | -5.473  |
| RIMS3   | 27.063 | -4.713      | 31.775 | -6.635  | 1.921  | 0.264  | -1.921  |
| RIMS4   | 24.171 | -1.822      | 28.836 | -3.695  | 1.873  | 0.273  | -1.873  |
| SLC18A2 | 27.918 | -5.569      | 35.930 | -10.790 | 5.221  | 0.027  | -5.221  |
| SLC18A3 | 28.925 | -6.576      | 31.935 | -6.795  | 0.219  | 0.859  | -0.219  |
| SLC1A3  | 22.752 | -0.402      | 25.788 | -0.648  | 0.246  | 0.843  | -0.246  |
| SLC32A1 | 32.869 | -10.52<br>0 | 32.586 | -7.446  | -3.075 | 8.424  | 3.075   |
| SLC5A7  | 26.900 | -4.550      | 32.400 | -7.260  | 2.710  | 0.153  | -2.710  |

|         |        |         |        |         |        |        |         |
|---------|--------|---------|--------|---------|--------|--------|---------|
| SLC6A1  | 29.817 | -7.468  | 32.352 | -7.212  | -0.256 | 1.194  | 0.256   |
| SLC6A11 | 25.801 | -3.452  | 31.115 | -5.975  | 2.523  | 0.174  | -2.523  |
| SLC6A12 | 27.546 | -5.197  | 35.466 | -10.326 | 5.129  | 0.029  | -5.129  |
| SLC6A13 | 31.415 | -9.066  | 41.000 | -15.860 | 6.794  | 0.009  | -6.794  |
| SLC6A15 | 25.256 | -2.907  | 30.701 | -5.561  | 2.654  | 0.159  | -2.654  |
| SLC6A16 | 37.044 | -14.695 | 36.309 | -11.169 | -3.526 | 11.517 | 3.526   |
| SLC6A18 | 35.747 | -13.398 | 41.000 | -15.860 | 2.462  | 0.182  | -2.462  |
| SLC6A2  | 29.022 | -6.672  | 34.032 | -8.891  | 2.219  | 0.215  | -2.219  |
| SLC6A20 | 28.239 | -5.890  | 33.795 | -8.654  | 2.765  | 0.147  | -2.765  |
| SLC6A4  | 24.688 | -2.339  | 41.000 | -15.860 | 13.521 | 0.000  | -13.521 |
| SLC6A5  | 29.312 | -6.963  | 31.365 | -6.225  | -0.738 | 1.668  | 0.738   |
| SLC6A6  | 24.076 | -1.726  | 30.917 | -5.777  | 4.050  | 0.060  | -4.050  |
| SLC6A7  | 33.942 | -11.593 | 34.456 | -9.316  | -2.277 | 4.848  | 2.277   |
| SLC6A8  | 21.614 | 0.736   | 29.670 | -4.530  | 5.265  | 0.026  | -5.265  |
| SLC6A9  | 28.075 | -5.726  | 41.000 | -15.860 | 10.134 | 0.001  | -10.134 |
| SNPH    | 24.745 | -2.396  | 41.000 | -15.860 | 13.464 | 0.000  | -13.464 |
| STX1A   | 25.476 | -3.126  | 34.270 | -9.129  | 6.003  | 0.016  | -6.003  |
| STX1B   | 24.932 | -2.582  | 29.870 | -4.730  | 2.148  | 0.226  | -2.148  |
| STX3    | 23.130 | -0.781  | 34.481 | -9.341  | 8.560  | 0.003  | -8.560  |
| STXBP1  | 22.473 | -0.124  | 28.751 | -3.611  | 3.487  | 0.089  | -3.487  |
| SV2A    | 22.870 | -0.520  | 29.740 | -4.600  | 4.080  | 0.059  | -4.080  |
| SYN1    | 25.416 | -3.067  | 29.018 | -3.878  | 0.811  | 0.570  | -0.811  |
| SYN2    | 24.842 | -2.493  | 29.858 | -4.717  | 2.225  | 0.214  | -2.225  |
| SYN3    | 25.811 | -3.462  | 29.486 | -4.346  | 0.884  | 0.542  | -0.884  |
| SYP     | 23.301 | -0.951  | 27.844 | -2.704  | 1.753  | 0.297  | -1.753  |
| SYT1    | 24.036 | -1.687  | 28.535 | -3.394  | 1.708  | 0.306  | -1.708  |
| TPH1    | 21.969 | 0.380   | 33.496 | -8.356  | 8.736  | 0.002  | -8.736  |
| 18S     | 4.418  |         |        |         |        |        |         |
| GUSB    | 23.498 |         | 26.753 |         |        |        |         |
| HPRT1   | 23.007 | 0.492   | 31.987 | -5.234  | 5.726  | 0.019  | -5.726  |
| GAPDH   | 18.410 |         | 31.307 | -4.554  | 4.554  | 0.043  | -4.554  |
| IL1A    | 26.294 | -2.795  | 41.000 | -14.247 | 11.452 | 0.000  | -11.452 |
| IL1B    | 25.902 | -2.404  | 37.074 | -10.321 | 7.917  | 0.004  | -7.917  |
| IL2     | 37.521 | -14.022 | 41.000 | -14.247 | 0.225  | 0.856  | -0.225  |
| IL3     | UDT    |         | UDT    |         |        |        |         |
| IL4     | UDT    |         | UDT    |         |        |        |         |
| IL5     | 36.911 | -13.413 | 41.000 | -14.247 | 0.834  | 0.561  | -0.834  |

|        |        |         |        |         |        |        |        |
|--------|--------|---------|--------|---------|--------|--------|--------|
| IL6    | 28.923 | -5.425  | 36.788 | -10.035 | 4.610  | 0.041  | -4.610 |
| IL7    | 29.994 | -6.496  | 36.807 | -10.054 | 3.558  | 0.085  | -3.558 |
| IL8    | 23.324 | 0.174   | 31.975 | -5.222  | 5.396  | 0.024  | -5.396 |
| IL9    | 36.586 | -13.088 | 41.000 | -14.247 | 1.159  | 0.448  | -1.159 |
| IL10   | 29.127 | -5.629  | 41.000 | -14.247 | 8.618  | 0.003  | -8.618 |
| IL12A  | 31.476 | -7.977  | 34.297 | -7.544  | -0.433 | 1.350  | 0.433  |
| IL12B  | 36.211 | -12.713 | 41.000 | -14.247 | 1.534  | 0.345  | -1.534 |
| IL13   | 37.285 | -13.786 | 41.000 | -14.247 | 0.461  | 0.727  | -0.461 |
| IL15   | 31.824 | -8.326  | 41.000 | -14.247 | 5.921  | 0.017  | -5.921 |
| IL17A  | UDT    |         | UDT    |         |        |        |        |
| IL18   | 30.782 | -7.284  | 41.000 | -14.247 | 6.963  | 0.008  | -6.963 |
| CCL3   | 31.202 | -7.704  | 36.284 | -9.531  | 1.827  | 0.282  | -1.827 |
| CCL19  | 30.937 | -7.438  | 33.579 | -6.826  | -0.612 | 1.529  | 0.612  |
| CCL2   | 22.749 | 0.750   | 30.598 | -3.845  | 4.595  | 0.041  | -4.595 |
| CCL5   | 29.127 | -5.629  | 28.539 | -1.786  | -3.843 | 14.346 | 3.843  |
| CCR2   | 38.102 | -14.604 | 41.000 | -14.247 | -0.357 | 1.281  | 0.357  |
| CCR4   | 30.485 | -6.987  | 30.483 | -3.730  | -3.257 | 9.557  | 3.257  |
| CCR5   | 34.342 | -10.844 | 41.000 | -14.247 | 3.403  | 0.095  | -3.403 |
| CCR7   | 29.918 | -6.420  | 41.000 | -14.247 | 7.827  | 0.004  | -7.827 |
| CXCR3  | 34.716 | -11.217 | 41.000 | -14.247 | 3.030  | 0.122  | -3.030 |
| CXCL10 | 27.561 | -4.063  | 28.448 | -1.695  | -2.368 | 5.162  | 2.368  |
| CXCL11 | 28.559 | -5.060  | 28.639 | -1.886  | -3.174 | 9.026  | 3.174  |
| CSF1   | 23.859 | -0.360  | 30.444 | -3.691  | 3.331  | 0.099  | -3.331 |
| CSF2   | 30.007 | -6.508  | 41.000 | -14.247 | 7.739  | 0.005  | -7.739 |
| CSF3   | 28.321 | -4.823  | 41.000 | -14.247 | 9.424  | 0.001  | -9.424 |
| STAT3  | 21.286 | 2.213   | 27.303 | -0.550  | 2.763  | 0.147  | -2.763 |
| NFKB2  | 24.020 | -0.521  | 30.886 | -4.133  | 3.612  | 0.082  | -3.612 |
| IKBKB  | 24.590 | -1.092  | 33.643 | -6.890  | 5.798  | 0.018  | -5.798 |
| CD3E   | 32.383 | -8.884  | 41.000 | -14.247 | 5.363  | 0.024  | -5.363 |
| CD4    | 28.869 | -5.370  | 34.384 | -7.631  | 2.261  | 0.209  | -2.261 |
| CD8A   | 28.828 | -5.330  | 30.385 | -3.632  | -1.698 | 3.244  | 1.698  |
| CD19   | 36.392 | -12.893 | 41.000 | -14.247 | 1.354  | 0.391  | -1.354 |
| IL2RA  | 34.444 | -10.946 | 41.000 | -14.247 | 3.301  | 0.101  | -3.301 |

|           |        |         |        |         |        |       |        |
|-----------|--------|---------|--------|---------|--------|-------|--------|
| CD28      | 34.856 | -11.358 | 41.000 | -14.247 | 2.889  | 0.135 | -2.889 |
| CD38      | 32.191 | -8.693  | 33.777 | -7.024  | -1.669 | 3.180 | 1.669  |
| CD40      | 26.560 | -3.062  | 34.174 | -7.421  | 4.359  | 0.049 | -4.359 |
| PTPRC     | 32.506 | -9.008  | 37.057 | -10.304 | 1.296  | 0.407 | -1.296 |
| CD68      | 23.904 | -0.405  | 29.936 | -3.183  | 2.778  | 0.146 | -2.778 |
| CD80      | 33.718 | -10.220 | 41.000 | -14.247 | 4.027  | 0.061 | -4.027 |
| CD86      | 34.604 | -11.106 | 41.000 | -14.247 | 3.141  | 0.113 | -3.141 |
| CTLA4     | 34.564 | -11.065 | 41.000 | -14.247 | 3.182  | 0.110 | -3.182 |
| CD40LG    | 39.231 | -15.732 | 41.000 | -14.247 | -1.485 | 2.800 | 1.485  |
| HLA-DR A  | 30.344 | -6.846  | 34.872 | -8.119  | 1.273  | 0.414 | -1.273 |
| HLA-DRB 1 | UDT    |         | UDT    |         |        |       |        |
| TBX21     | 31.993 | -8.495  | 41.000 | -14.247 | 5.752  | 0.019 | -5.752 |
| TNFRSF18  | 30.559 | -7.060  | 37.496 | -10.743 | 3.683  | 0.078 | -3.683 |
| ICOS      | 36.160 | -12.662 | 41.000 | -14.247 | 1.585  | 0.333 | -1.585 |
| NOS2      | 31.609 | -8.111  | 33.575 | -6.822  | -1.289 | 2.443 | 1.289  |
| BCL2      | 24.410 | -0.912  | 29.992 | -3.239  | 2.327  | 0.199 | -2.327 |
| BCL2L1    | 26.495 | -2.997  | 34.109 | -7.356  | 4.359  | 0.049 | -4.359 |
| BAX       | 21.558 | 1.940   | 28.503 | -1.750  | 3.690  | 0.077 | -3.690 |
| ICAM1     | 24.207 | -0.708  | 32.995 | -6.242  | 5.534  | 0.022 | -5.534 |
| SELP      | 29.187 | -5.689  | 41.000 | -14.247 | 8.558  | 0.003 | -8.558 |
| SELE      | 28.415 | -4.916  | 41.000 | -14.247 | 9.331  | 0.002 | -9.331 |
| HMOX1     | 23.861 | -0.363  | 32.930 | -6.177  | 5.814  | 0.018 | -5.814 |
| PTGS2     | 24.462 | -0.964  | 33.354 | -6.601  | 5.637  | 0.020 | -5.637 |
| LRP2      | 30.028 | -6.529  | 31.890 | -5.137  | -1.392 | 2.625 | 1.392  |
| CYP1A2    | UDT    |         | UDT    |         |        |       |        |
| CYP7A1    | 33.329 | -9.830  | 41.000 | -14.247 | 4.417  | 0.047 | -4.417 |
| IFNG      | UDT    |         | UDT    |         |        |       |        |
| PRF1      | 34.518 | -11.020 | 41.000 | -14.247 | 3.227  | 0.107 | -3.227 |
| GZMB      | 36.465 | -12.967 | 41.000 | -14.247 | 1.280  | 0.412 | -1.280 |
| GNLY      | UDT    |         | UDT    |         |        |       |        |
| FAS       | 24.398 | -0.899  | 33.822 | -7.069  | 6.170  | 0.014 | -6.170 |
| FASLG     | UDT    |         | UDT    |         |        |       |        |

|        |        |         |        |         |        |       |        |
|--------|--------|---------|--------|---------|--------|-------|--------|
| TGFB1  | 22.243 | 1.256   | 29.953 | -3.200  | 4.456  | 0.046 | -4.456 |
| SMAD3  | 23.706 | -0.207  | 30.837 | -4.084  | 3.877  | 0.068 | -3.877 |
| SMAD7  | 24.199 | -0.701  | 32.804 | -6.051  | 5.350  | 0.025 | -5.350 |
| SKI    | 21.226 | 2.272   | 27.095 | -0.342  | 2.614  | 0.163 | -2.614 |
| FN1    | 16.018 | 7.481   | 26.893 | -0.140  | 7.621  | 0.005 | -7.621 |
| C3     | 21.407 | 2.091   | 31.205 | -4.452  | 6.543  | 0.011 | -6.543 |
| TNF    | 29.850 | -6.352  | 35.580 | -8.827  | 2.475  | 0.180 | -2.475 |
| LTA    | 33.964 | -10.465 | 36.279 | -9.526  | -0.939 | 1.917 | 0.939  |
| ACE    | 28.256 | -4.757  | 34.543 | -7.790  | 3.033  | 0.122 | -3.033 |
| VEGFA  | 23.275 | 0.224   | 28.965 | -2.212  | 2.436  | 0.185 | -2.436 |
| CD34   | 28.925 | -5.426  | 41.000 | -14.247 | 8.821  | 0.002 | -8.821 |
| AGTR1  | 32.417 | -8.918  | 41.000 | -14.247 | 5.329  | 0.025 | -5.329 |
| AGTR2  | 30.021 | -6.522  | 36.485 | -9.732  | 3.210  | 0.108 | -3.210 |
| EDN1   | 23.585 | -0.087  | 33.951 | -7.198  | 7.111  | 0.007 | -7.111 |
| LIF    | 23.354 | 0.145   | 33.222 | -6.469  | 6.614  | 0.010 | -6.614 |
| LY96   | 28.819 | -5.320  | 39.630 | -12.877 | 7.557  | 0.005 | -7.557 |
| MIF    | 18.354 | 5.144   | 23.188 | 3.565   | 1.579  | 0.335 | -1.579 |
| NFATC3 | 23.310 | 0.188   | 26.618 | 0.135   | 0.053  | 0.964 | -0.053 |
| NFATC4 | 23.702 | -0.204  | 31.321 | -4.568  | 4.364  | 0.049 | -4.364 |
| PF4    | 32.745 | -9.246  | 41.000 | -14.247 | 5.001  | 0.031 | -5.001 |
| SYK    | 25.367 | -1.869  | 33.654 | -6.901  | 5.032  | 0.031 | -5.032 |
| 18S    | 4.975  |         | 19.344 |         |        |       |        |
| GUSB   | 24.178 |         | 26.217 |         |        |       |        |
| HPRT1  | 23.756 | 0.422   | 31.480 | -5.263  | 5.685  | 0.019 | -5.685 |
| GAPDH  | 18.910 | 5.268   | 30.780 | -4.563  | 9.831  | 0.001 | -9.831 |
| ABCA1  | 22.968 | 1.211   | 32.539 | -6.322  | 7.533  | 0.005 | -7.533 |
| ADAM10 | 21.874 | 2.304   | 29.774 | -3.557  | 5.861  | 0.017 | -5.861 |
| ADAM17 | 24.215 | -0.037  | 31.301 | -5.084  | 5.047  | 0.030 | -5.047 |
| ADAM9  | 20.640 | 3.538   | 27.340 | -1.123  | 4.661  | 0.040 | -4.661 |
| APBA1  | 26.612 | -2.434  | 29.538 | -3.321  | 0.888  | 0.540 | -0.888 |
| APBA2  | 27.247 | -3.069  | 31.126 | -4.909  | 1.840  | 0.279 | -1.840 |
| APBA3  | 26.384 | -2.205  | 33.519 | -7.302  | 5.096  | 0.029 | -5.096 |
| APBB1  | 24.973 | -0.795  | 29.453 | -3.236  | 2.441  | 0.184 | -2.441 |
| APBB2  | 23.635 | 0.543   | 30.642 | -4.425  | 4.968  | 0.032 | -4.968 |
| APBB3  | 26.463 | -2.284  | 34.929 | -8.712  | 6.428  | 0.012 | -6.428 |
| APCS   | UDT    |         | UDT    |         |        |       |        |
| APH1A  | 25.096 | -0.918  | 29.971 | -3.754  | 2.836  | 0.140 | -2.836 |
| APH1B  | 24.753 | -0.575  | 30.766 | -4.549  | 3.975  | 0.064 | -3.975 |
| APLP1  | 26.146 | -1.968  | 29.696 | -3.479  | 1.511  | 0.351 | -1.511 |
| APLP2  | 21.738 | 2.440   | 29.563 | -3.346  | 5.787  | 0.018 | -5.787 |

|          |        |             |        |         |        |        |         |
|----------|--------|-------------|--------|---------|--------|--------|---------|
| APOE     | 20.729 | 3.449       | 29.871 | -3.654  | 7.103  | 0.007  | -7.103  |
| APP      | 18.600 | 5.578       | 23.331 | 2.886   | 2.692  | 0.155  | -2.692  |
| BACE1    | 24.263 | -0.085      | 30.446 | -4.229  | 4.144  | 0.057  | -4.144  |
| BACE2    | 22.657 | 1.521       | 28.379 | -2.162  | 3.683  | 0.078  | -3.683  |
| CAPN1    | 21.127 | 3.051       | 30.895 | -4.678  | 7.729  | 0.005  | -7.729  |
| CASP3    | 25.482 | -1.304      | 32.375 | -6.158  | 4.854  | 0.035  | -4.854  |
| CASP6    | 24.998 | -0.819      | 31.753 | -5.536  | 4.716  | 0.038  | -4.716  |
| CDC2     | 25.776 | -1.598      | 31.789 | -5.572  | 3.975  | 0.064  | -3.975  |
| CDK5     | 25.157 | -0.978      | 29.955 | -3.738  | 2.760  | 0.148  | -2.760  |
| CDK5R1   | 25.552 | -1.374      | 27.194 | -0.977  | -0.397 | 1.317  | 0.397   |
| SLC18A3  | 30.740 | -6.562      | 33.265 | -7.048  | 0.486  | 0.714  | -0.486  |
| CSNK1A1  | 24.199 | -0.021      | 30.176 | -3.959  | 3.938  | 0.065  | -3.938  |
| CTSB     | 20.521 | 3.658       | 29.549 | -3.332  | 6.989  | 0.008  | -6.989  |
| CTSC     | 19.266 | 4.912       | 29.442 | -3.225  | 8.137  | 0.004  | -8.137  |
| CTSD     | 20.005 | 4.173       | 30.636 | -4.419  | 8.592  | 0.003  | -8.592  |
| CTSG     | UDT    |             | UDT    |         |        |        |         |
| BPTF     | 23.545 | 0.633       | 28.645 | -2.428  | 3.061  | 0.120  | -3.061  |
| GJB1     | 29.543 | -5.364      | 30.458 | -4.241  | -1.123 | 2.178  | 1.123   |
| GLS      | 23.467 | 0.711       | 32.707 | -6.490  | 7.202  | 0.007  | -7.202  |
| GRIN1    | 27.845 | -3.666      | 25.970 | 0.247   | -3.914 | 15.070 | 3.914   |
| GRIN2A   | 28.442 | -4.263      | 33.627 | -7.411  | 3.147  | 0.113  | -3.147  |
| GRIN2B   | 30.698 | -6.520      | 29.232 | -3.015  | -3.504 | 11.349 | 3.504   |
| GRIN2D   | 24.497 | -0.319      | 30.824 | -4.607  | 4.289  | 0.051  | -4.289  |
| GSK3B    | 23.268 | 0.910       | 26.007 | 0.210   | 0.700  | 0.616  | -0.700  |
| HSD17B10 | 23.409 | 0.769       | 29.477 | -3.260  | 4.029  | 0.061  | -4.029  |
| IDE      | 25.395 | -1.216      | 31.278 | -5.062  | 3.845  | 0.070  | -3.845  |
| IFNG     | UDT    |             | UDT    |         |        |        |         |
| IL1A     | 26.896 | -2.718      | 35.520 | -9.303  | 6.585  | 0.010  | -6.585  |
| IL1B     | 26.574 | -2.396      | UDT    |         |        |        |         |
| IL6      | 29.742 | -5.563      | 37.171 | -10.954 | 5.391  | 0.024  | -5.391  |
| INS      | 36.081 | -11.90<br>2 | 41.000 | -14.783 | 2.881  | 0.136  | -2.881  |
| INSR     | 24.664 | -0.486      | 33.270 | -7.053  | 6.567  | 0.011  | -6.567  |
| LRP1     | 20.966 | 3.212       | 29.703 | -3.486  | 6.699  | 0.010  | -6.699  |
| LRP2     | 30.842 | -6.664      | 32.670 | -6.453  | -0.211 | 1.158  | 0.211   |
| LRPAP1   | 22.717 | 1.461       | 30.572 | -4.355  | 5.817  | 0.018  | -5.817  |
| MAPK1    | 24.405 | -0.227      | 28.598 | -2.381  | 2.154  | 0.225  | -2.154  |
| MAPK3    | 23.677 | 0.501       | 28.830 | -2.613  | 3.115  | 0.115  | -3.115  |
| MAPT     | 24.924 | -0.746      | 24.552 | 1.665   | -2.411 | 5.318  | 2.411   |
| MME      | 23.724 | 0.455       | 36.304 | -10.087 | 10.542 | 0.001  | -10.542 |
| NCSTN    | 23.617 | 0.561       | 30.541 | -4.325  | 4.886  | 0.034  | -4.886  |

|          |        |         |        |         |        |       |         |
|----------|--------|---------|--------|---------|--------|-------|---------|
| PDE8B    | 25.386 | -1.208  | 34.360 | -8.143  | 6.935  | 0.008 | -6.935  |
| PSENN    | 31.480 | -7.302  | 32.922 | -6.705  | -0.597 | 1.512 | 0.597   |
| PLD1     | 24.803 | -0.624  | 34.716 | -8.499  | 7.875  | 0.004 | -7.875  |
| PPP2CA   | 22.875 | 1.304   | 29.710 | -3.493  | 4.796  | 0.036 | -4.796  |
| PRKACB   | 25.885 | -1.707  | 29.953 | -3.736  | 2.029  | 0.245 | -2.029  |
| PRKCA    | 27.197 | -3.018  | 31.386 | -5.169  | 2.151  | 0.225 | -2.151  |
| PRKCB    | 25.911 | -1.733  | 28.649 | -2.432  | 0.700  | 0.616 | -0.700  |
| PRKCE    | 27.441 | -3.263  | 31.072 | -4.855  | 1.592  | 0.332 | -1.592  |
| PRKCG    | 30.863 | -6.685  | 32.720 | -6.503  | -0.182 | 1.135 | 0.182   |
| PKN1     | 22.940 | 1.238   | 28.526 | -2.309  | 3.547  | 0.086 | -3.547  |
| PSEN1    | 24.909 | -0.731  | 34.378 | -8.161  | 7.430  | 0.006 | -7.430  |
| PSEN2    | 26.583 | -2.405  | 35.637 | -9.420  | 7.015  | 0.008 | -7.015  |
| SERPINA3 | 26.133 | -1.955  | 32.726 | -6.509  | 4.554  | 0.043 | -4.554  |
| SNCA     | 23.510 | 0.669   | 29.709 | -3.492  | 4.160  | 0.056 | -4.160  |
| SOAT1    | 25.510 | -1.332  | 33.852 | -7.635  | 6.303  | 0.013 | -6.303  |
| SOD2     | 21.755 | 2.423   | 29.323 | -3.106  | 5.529  | 0.022 | -5.529  |
| CAPNS2   | 23.103 | 1.075   | 29.752 | -3.535  | 4.610  | 0.041 | -4.610  |
| TNF      | 30.548 | -6.370  | 41.000 | -14.783 | 8.414  | 0.003 | -8.414  |
| UCHL1    | 21.707 | 2.471   | 26.617 | -0.400  | 2.871  | 0.137 | -2.871  |
| VSNL1    | 27.649 | -3.471  | 34.690 | -8.473  | 5.002  | 0.031 | -5.002  |
| GAL      | 29.142 | -4.964  | 33.295 | -7.078  | 2.114  | 0.231 | -2.114  |
| ACHE     | 24.642 | -0.464  | 35.310 | -9.093  | 8.629  | 0.003 | -8.629  |
| AGER     | 27.959 | -3.780  | 41.000 | -14.783 | 11.003 | 0.000 | -11.003 |
| NAE1     | 26.691 | -2.513  | 33.495 | -7.278  | 4.766  | 0.037 | -4.766  |
| BCHE     | 28.987 | -4.809  | 38.093 | -11.876 | 7.068  | 0.007 | -7.068  |
| CAPNS1   | 20.366 | 3.812   | 29.737 | -3.521  | 7.333  | 0.006 | -7.333  |
| CHRNA7   | 28.672 | -4.493  | 34.965 | -8.748  | 4.255  | 0.052 | -4.255  |
| CSNK1D   | 21.767 | 2.411   | 28.475 | -2.258  | 4.669  | 0.039 | -4.669  |
| CYP46A1  | 35.514 | -11.335 | 41.000 | -14.783 | 3.448  | 0.092 | -3.448  |
| GAP43    | 24.747 | -0.568  | 29.559 | -3.342  | 2.774  | 0.146 | -2.774  |
| GRIN2C   | 27.815 | -3.637  | 36.335 | -10.118 | 6.481  | 0.011 | -6.481  |
| SLC30A3  | 33.262 | -9.083  | 37.525 | -11.308 | 2.225  | 0.214 | -2.225  |
| ST6GAL1  | 28.664 | -4.486  | 33.207 | -6.990  | 2.504  | 0.176 | -2.504  |
| UBQLN1   | 22.741 | 1.438   | 28.774 | -2.557  | 3.995  | 0.063 | -3.995  |

**Table S2.** Gene expression data and analysis for PD organoids and PD organoids infected with CHIKV obtained 14 days post inoculation. UDT: undetermined

|         | PD     | DCt     | PD-CHI<br>KV | DCt     | DDCt   | fold<br>change | log fold<br>change |
|---------|--------|---------|--------------|---------|--------|----------------|--------------------|
| Gene ID | raw CT |         |              |         |        |                |                    |
| 18S     | 16.131 |         | 16.565       |         |        |                |                    |
| GUSB    | 28.835 |         | 27.891       |         |        |                |                    |
| HPRT1   | 29.402 |         | 28.859       |         |        |                |                    |
| GAPDH   | 23.696 |         | 23.526       |         |        |                |                    |
| ABAT    | 26.914 | 1.920   | 27.652       | 0.239   | 1.682  | 0.312          | -1.682             |
| ACHE    | 33.431 | -4.596  | 32.699       | -4.808  | 0.212  | 0.863          | -0.212             |
| BSN     | 32.680 | -3.845  | 33.529       | -5.639  | 1.794  | 0.288          | -1.794             |
| CHAT    | 33.163 | -4.328  | 32.772       | -4.881  | 0.554  | 0.681          | -0.554             |
| CHRM1   | 34.386 | -5.551  | 35.210       | -7.319  | 1.768  | 0.294          | -1.768             |
| CHRM2   | 28.788 | 0.046   | 30.496       | -2.605  | 2.652  | 0.159          | -2.652             |
| CHRM3   | 30.742 | -1.907  | 33.300       | -5.409  | 3.502  | 0.088          | -3.502             |
| CHRM4   | 28.544 | 0.291   | 32.125       | -4.234  | 4.525  | 0.043          | -4.525             |
| CHRM5   | 33.593 | -4.758  | 33.617       | -5.727  | 0.968  | 0.511          | -0.968             |
| CHRNA2  | 33.707 | -4.872  | 33.569       | -5.679  | 0.806  | 0.572          | -0.806             |
| CHRNA3  | 33.995 | -5.160  | 31.535       | -3.644  | -1.515 | 2.859          | 1.515              |
| CHRNA4  | 30.011 | -1.176  | 30.347       | -2.457  | 1.281  | 0.412          | -1.281             |
| CHRNA5  | 33.637 | -4.802  | 32.700       | -4.809  | 0.007  | 0.995          | -0.007             |
| CHRNA6  | 34.543 | -5.708  | 33.552       | -5.662  | -0.047 | 1.033          | 0.047              |
| CHRN2   | 30.461 | -1.626  | 30.712       | -2.821  | 1.195  | 0.437          | -1.195             |
| CHRN3   | 34.004 | -5.169  | 34.036       | -6.145  | 0.976  | 0.508          | -0.976             |
| CHRN4   | 30.293 | -1.458  | 29.375       | -1.485  | 0.027  | 0.982          | -0.027             |
| CHRNA   | 33.508 | -4.673  | 31.779       | -3.889  | -0.784 | 1.722          | 0.784              |
| CHRNE   | 35.241 | -6.406  | 36.525       | -8.635  | 2.229  | 0.213          | -2.229             |
| COMT    | 30.211 | -1.376  | 32.470       | -4.579  | 3.203  | 0.109          | -3.203             |
| CPLX1   | 32.251 | -3.417  | 32.332       | -4.441  | 1.025  | 0.492          | -1.025             |
| DRD2    | 30.605 | -1.770  | 31.010       | -3.119  | 1.349  | 0.393          | -1.349             |
| DRD3    | 38.139 | -9.304  | 41.000       | -13.109 | 3.805  | 0.072          | -3.805             |
| GABBR1  | 25.598 | 3.237   | 25.862       | 2.029   | 1.208  | 0.433          | -1.208             |
| GABRA1  | 32.755 | -3.920  | 34.206       | -6.315  | 2.395  | 0.190          | -2.395             |
| GABRA2  | 34.440 | -5.605  | 35.238       | -7.348  | 1.743  | 0.299          | -1.743             |
| GABRA4  | 36.282 | -7.447  | 35.484       | -7.593  | 0.146  | 0.904          | -0.146             |
| GABRA5  | 28.163 | 0.672   | 30.221       | -2.330  | 3.001  | 0.125          | -3.001             |
| GABRA6  | 41.000 | -12.165 | 41.000       | -13.109 | 0.944  | 0.520          | -0.944             |
| GABRB1  | 29.976 | -1.141  | 32.454       | -4.563  | 3.422  | 0.093          | -3.422             |
| GABRB2  | 32.442 | -3.607  | 34.744       | -6.853  | 3.246  | 0.105          | -3.246             |
| GABRB3  | 26.651 | 2.184   | 30.497       | -2.606  | 4.791  | 0.036          | -4.791             |
| GABRD   | 35.787 | -6.952  | 35.923       | -8.033  | 1.081  | 0.473          | -1.081             |
| GABRE   | 31.348 | -2.513  | 30.511       | -2.620  | 0.107  | 0.928          | -0.107             |

|         |        |         |        |         |        |        |        |
|---------|--------|---------|--------|---------|--------|--------|--------|
| GABRG1  | 35.851 | -7.016  | 34.730 | -6.840  | -0.176 | 1.130  | 0.176  |
| GABRG2  | 29.925 | -1.090  | 30.851 | -2.960  | 1.870  | 0.274  | -1.870 |
| GABRG3  | 32.351 | -3.516  | 33.147 | -5.256  | 1.740  | 0.299  | -1.740 |
| GABRP   | 34.678 | -5.843  | 34.391 | -6.501  | 0.658  | 0.634  | -0.658 |
| GABRQ   | 28.760 | 0.075   | 29.819 | -1.928  | 2.004  | 0.249  | -2.004 |
| GABRR1  | 34.513 | -5.678  | 36.634 | -8.743  | 3.065  | 0.119  | -3.065 |
| GABRR2  | 34.542 | -5.707  | 34.463 | -6.572  | 0.865  | 0.549  | -0.865 |
| GAD1    | 31.556 | -2.721  | 31.970 | -4.080  | 1.359  | 0.390  | -1.359 |
| GCH1    | 34.512 | -5.677  | 32.409 | -4.518  | -1.159 | 2.232  | 1.159  |
| GLRA1   | 28.739 | 0.096   | 30.983 | -3.093  | 3.188  | 0.110  | -3.188 |
| GLRA2   | 29.496 | -0.661  | 27.889 | 0.002   | -0.663 | 1.583  | 0.663  |
| GLRA3   | 31.541 | -2.706  | 31.165 | -3.274  | 0.569  | 0.674  | -0.569 |
| GLRB    | 29.934 | -1.099  | 29.358 | -1.467  | 0.368  | 0.775  | -0.368 |
| GRIA1   | 26.972 | 1.863   | 27.188 | 0.703   | 1.160  | 0.447  | -1.160 |
| GRIK4   | 33.695 | -4.861  | 33.486 | -5.595  | 0.734  | 0.601  | -0.734 |
| HTR1B   | 30.941 | -2.106  | 31.236 | -3.345  | 1.240  | 0.423  | -1.240 |
| HTR1E   | 32.254 | -3.419  | 31.614 | -3.723  | 0.305  | 0.810  | -0.305 |
| HTR2A   | 29.439 | -0.604  | 29.740 | -1.849  | 1.246  | 0.422  | -1.246 |
| HTR3A   | 34.370 | -5.535  | 31.314 | -3.423  | -2.112 | 4.322  | 2.112  |
| HTR3B   | 41.000 | -12.165 | 41.000 | -13.109 | 0.944  | 0.520  | -0.944 |
| HTR7    | 33.555 | -4.720  | 36.188 | -8.298  | 3.577  | 0.084  | -3.577 |
| MAOA    | 27.679 | 1.156   | 28.404 | -0.513  | 1.669  | 0.315  | -1.669 |
| PHOX2A  | 34.196 | -5.361  | 31.973 | -4.082  | -1.278 | 2.426  | 1.278  |
| RIMS1   | 34.754 | -5.919  | 34.553 | -6.663  | 0.743  | 0.597  | -0.743 |
| RIMS3   | 32.461 | -3.626  | 31.719 | -3.829  | 0.202  | 0.869  | -0.202 |
| RIMS4   | 27.877 | 0.958   | 27.578 | 0.313   | 0.645  | 0.639  | -0.645 |
| SLC18A2 | 35.731 | -6.896  | 32.329 | -4.438  | -2.458 | 5.495  | 2.458  |
| SLC18A3 | 32.810 | -3.975  | 30.856 | -2.965  | -1.010 | 2.013  | 1.010  |
| SLC1A3  | 23.976 | 4.859   | 24.873 | 3.018   | 1.842  | 0.279  | -1.842 |
| SLC32A1 | 37.388 | -8.553  | 41.000 | -13.109 | 4.556  | 0.043  | -4.556 |
| SLC5A7  | 28.812 | 0.023   | 28.373 | -0.482  | 0.505  | 0.705  | -0.505 |
| SLC6A1  | 30.899 | -2.064  | 32.843 | -4.953  | 2.888  | 0.135  | -2.888 |
| SLC6A11 | 30.300 | -1.465  | 33.219 | -5.328  | 3.863  | 0.069  | -3.863 |
| SLC6A12 | 35.825 | -6.990  | 34.648 | -6.757  | -0.233 | 1.176  | 0.233  |
| SLC6A13 | 37.836 | -9.001  | 37.453 | -9.562  | 0.561  | 0.678  | -0.561 |
| SLC6A15 | 32.458 | -3.623  | 30.466 | -2.575  | -1.048 | 2.067  | 1.048  |
| SLC6A16 | 41.000 | -12.165 | 36.867 | -8.976  | -3.189 | 9.120  | 3.189  |
| SLC6A18 | 41.000 | -12.165 | 41.000 | -13.109 | 0.944  | 0.520  | -0.944 |
| SLC6A2  | 41.000 | -12.165 | 37.711 | -9.821  | -2.345 | 5.079  | 2.345  |
| SLC6A20 | 32.169 | -3.334  | 33.407 | -5.516  | 2.182  | 0.220  | -2.182 |
| SLC6A4  | 41.000 | -12.165 | 36.171 | -8.280  | -3.885 | 14.775 | 3.885  |

|        |        |         |        |         |        |         |        |
|--------|--------|---------|--------|---------|--------|---------|--------|
| SLC6A5 | 34.502 | -5.667  | 35.186 | -7.295  | 1.628  | 0.323   | -1.628 |
| SLC6A6 | 29.683 | -0.848  | 29.763 | -1.872  | 1.024  | 0.492   | -1.024 |
| SLC6A7 | 32.174 | -3.339  | 41.000 | -13.109 | 9.770  | 0.001   | -9.770 |
| SLC6A8 | 27.653 | 1.182   | 27.658 | 0.233   | 0.949  | 0.518   | -0.949 |
| SLC6A9 | 36.727 | -7.892  | 41.000 | -13.109 | 5.217  | 0.027   | -5.217 |
| SNPH   | 41.000 | -12.165 | 41.000 | -13.109 | 0.944  | 0.520   | -0.944 |
| STX1A  | 37.650 | -8.815  | 33.485 | -5.594  | -3.222 | 9.328   | 3.222  |
| STX1B  | 36.292 | -7.457  | 34.159 | -6.268  | -1.189 | 2.281   | 1.189  |
| STX3   | 41.000 | -12.165 | 32.384 | -4.493  | -7.672 | 203.918 | 7.672  |
| STXBP1 | 29.626 | -0.791  | 30.438 | -2.547  | 1.756  | 0.296   | -1.756 |
| SV2A   | 29.722 | -0.887  | 31.799 | -3.909  | 3.021  | 0.123   | -3.021 |
| SYN1   | 29.521 | -0.686  | 32.353 | -4.462  | 3.776  | 0.073   | -3.776 |
| SYN2   | 30.807 | -1.972  | 32.353 | -4.462  | 2.491  | 0.178   | -2.491 |
| SYN3   | 28.871 | -0.036  | 32.501 | -4.611  | 4.575  | 0.042   | -4.575 |
| SYP    | 25.757 | 3.078   | 30.963 | -3.072  | 6.150  | 0.014   | -6.150 |
| SYT1   | 28.502 | 0.333   | 32.535 | -4.644  | 4.977  | 0.032   | -4.977 |
| TPH1   | 31.777 | -2.942  | 31.888 | -3.997  | 1.054  | 0.482   | -1.054 |
| 18S    | 14.695 |         | 16.386 |         |        |         |        |
| GUSB   | 25.935 |         | 29.317 |         |        |         |        |
| HPRT1  | 27.465 | -1.530  | 30.427 | -1.110  | -0.421 | 1.339   | 0.421  |
| GAPDH  | 21.603 | 4.332   | 24.668 | 4.649   | -0.318 | 1.246   | 0.318  |
| IL1A   | 31.130 | -5.195  | 31.867 | -2.549  | -2.646 | 6.258   | 2.646  |
| IL1B   | 32.355 | -6.420  | 31.447 | -2.129  | -4.291 | 19.574  | 4.291  |
| IL2    | 41.000 | -15.065 | 41.000 | -11.683 | -3.383 | 10.431  | 3.383  |
| IL3    | UDT    |         | UDT    |         |        |         |        |
| IL4    | UDT    |         | UDT    |         |        |         |        |
| IL5    | 41.000 | -15.065 | 36.810 | -7.493  | -7.572 | 190.334 | 7.572  |
| IL6    | 32.539 | -6.605  | 31.676 | -2.359  | -4.246 | 18.976  | 4.246  |
| IL7    | 31.689 | -5.754  | 32.541 | -3.223  | -2.531 | 5.780   | 2.531  |
| IL8    | 28.216 | -2.282  | 28.371 | 0.947   | -3.228 | 9.372   | 3.228  |
| IL9    | 41.000 | -15.065 | 41.000 | -11.683 | -3.383 | 10.431  | 3.383  |
| IL10   | 32.505 | -6.570  | 33.155 | -3.838  | -2.733 | 6.647   | 2.733  |
| IL12A  | 31.978 | -6.044  | 34.378 | -5.061  | -0.983 | 1.977   | 0.983  |
| IL12B  | UDT    |         | 41.000 | -11.683 |        |         |        |
| IL13   | UDT    |         | 41.000 | -11.683 |        |         |        |
| IL15   | 38.156 | -12.221 | 36.154 | -6.836  | -5.385 | 41.785  | 5.385  |
| IL17A  | UDT    |         | UDT    |         |        |         |        |
| IL18   | 38.248 | -12.314 | 36.352 | -7.035  | -5.279 | 38.825  | 5.279  |
| CCL3   | 26.129 | -0.194  | 24.971 | 4.346   | -4.540 | 23.265  | 4.540  |
| CCL19  | 29.821 | -3.886  | 28.579 | 0.739   | -4.625 | 24.672  | 4.625  |
| CCL2   | 26.539 | -0.605  | 25.861 | 3.456   | -4.061 | 16.689  | 4.061  |

|              |        |         |        |         |        |          |       |
|--------------|--------|---------|--------|---------|--------|----------|-------|
| CCL5         | 29.388 | -3.453  | 29.416 | -0.099  | -3.354 | 10.228   | 3.354 |
| CCR2         | 41.000 | -15.065 | 41.000 | -11.683 | -3.383 | 10.431   | 3.383 |
| CCR4         | 29.873 | -3.939  | 32.743 | -3.425  | -0.513 | 1.427    | 0.513 |
| CCR5         | 33.441 | -7.507  | 34.000 | -4.682  | -2.824 | 7.084    | 2.824 |
| CCR7         | 41.000 | -15.065 | 35.893 | -6.576  | -8.489 | 359.385  | 8.489 |
| CXCR3        | 41.000 | -15.065 | 41.000 | -11.683 | -3.383 | 10.431   | 3.383 |
| CXCL10       | 27.483 | -1.549  | 25.886 | 3.432   | -4.980 | 31.562   | 4.980 |
| CXCL11       | 28.931 | -2.997  | 27.641 | 1.677   | -4.674 | 25.520   | 4.674 |
| CSF1         | 26.525 | -0.591  | 27.029 | 2.289   | -2.880 | 7.359    | 2.880 |
| CSF2         | 41.000 | -15.065 | 35.262 | -5.945  | -9.121 | 556.700  | 9.121 |
| CSF3         | 41.000 | -15.065 | 34.405 | -5.088  | -9.978 | 1008.310 | 9.978 |
| STAT3        | 24.129 | 1.806   | 24.523 | 4.794   | -2.989 | 7.937    | 2.989 |
| NFKB2        | 27.840 | -1.906  | 28.233 | 1.084   | -2.990 | 7.945    | 2.990 |
| IKBKB        | 30.644 | -4.710  | 33.437 | -4.120  | -0.590 | 1.506    | 0.590 |
| CD3E         | 41.000 | -15.065 | 41.000 | -11.683 | -3.383 | 10.431   | 3.383 |
| CD4          | 29.730 | -3.795  | 30.220 | -0.902  | -2.893 | 7.428    | 2.893 |
| CD8A         | 26.917 | -0.983  | 29.450 | -0.133  | -0.850 | 1.802    | 0.850 |
| CD19         | 41.000 | -15.065 | 41.000 | -11.683 | -3.383 | 10.431   | 3.383 |
| IL2RA        | 30.241 | -4.307  | 30.578 | -1.261  | -3.046 | 8.260    | 3.046 |
| CD28         | 31.399 | -5.465  | 30.558 | -1.241  | -4.224 | 18.688   | 4.224 |
| CD38         | 31.732 | -5.797  | 31.756 | -2.439  | -3.358 | 10.257   | 3.358 |
| CD40         | 29.393 | -3.459  | 28.813 | 0.504   | -3.963 | 15.596   | 3.963 |
| PTPRC        | 29.796 | -3.861  | 29.612 | -0.294  | -3.567 | 11.851   | 3.567 |
| CD68         | 24.878 | 1.056   | 23.530 | 5.788   | -4.731 | 26.561   | 4.731 |
| CD80         | 41.000 | -15.065 | 34.401 | -5.084  | -9.982 | 1011.007 | 9.982 |
| CD86         | 32.912 | -6.977  | 32.742 | -3.424  | -3.553 | 11.734   | 3.553 |
| CTLA4        | 41.000 | -15.065 | 39.481 | -10.164 | -4.902 | 29.896   | 4.902 |
| CD40LG       | 41.000 | -15.065 | 41.000 | -11.683 | -3.383 | 10.431   | 3.383 |
| HLA-DR<br>A  | 32.429 | -6.495  | 29.706 | -0.389  | -6.106 | 68.864   | 6.106 |
| HLA-DR<br>B1 | UDT    |         | UDT    |         |        |          |       |
| TBX21        | 34.075 | -8.141  | 35.355 | -6.038  | -2.103 | 4.296    | 2.103 |
| TNFRSF1<br>8 | 36.763 | -10.829 | 35.437 | -6.119  | -4.710 | 26.165   | 4.710 |
| ICOS         | 41.000 | -15.065 | 38.918 | -9.601  | -5.465 | 44.157   | 5.465 |
| NOS2         | 33.995 | -8.061  | 33.290 | -3.973  | -4.088 | 17.002   | 4.088 |
| BCL2         | 27.860 | -1.925  | 28.591 | 0.726   | -2.652 | 6.284    | 2.652 |
| BCL2L1       | 30.469 | -4.534  | 30.875 | -1.558  | -2.976 | 7.869    | 2.976 |
| BAX          | 26.763 | -0.828  | 25.836 | 3.481   | -4.309 | 19.824   | 4.309 |
| ICAM1        | 30.276 | -4.341  | 28.615 | 0.703   | -5.044 | 32.992   | 5.044 |

|        |        |         |        |         |        |         |        |
|--------|--------|---------|--------|---------|--------|---------|--------|
| SELP   | 41.000 | -15.065 | 35.572 | -6.255  | -8.811 | 449.037 | 8.811  |
| SELE   | 41.000 | -15.065 | 34.787 | -5.470  | -9.596 | 773.646 | 9.596  |
| HMOX1  | 29.618 | -3.683  | 28.658 | 0.660   | -4.343 | 20.291  | 4.343  |
| PTGS2  | 31.319 | -5.385  | 30.188 | -0.871  | -4.514 | 22.848  | 4.514  |
| LRP2   | 29.929 | -3.995  | 30.431 | -1.114  | -2.881 | 7.366   | 2.881  |
| CYP1A2 | UDT    |         | UDT    |         |        |         |        |
| CYP7A1 | 41.000 | -15.065 | 41.000 | -11.683 | -3.383 | 10.431  | 3.383  |
| IFNG   | UDT    |         | UDT    |         |        |         |        |
| PRF1   | 41.000 | -15.065 | 37.594 | -8.277  | -6.789 | 110.566 | 6.789  |
| GZMB   | 35.673 | -9.738  | 33.517 | -4.200  | -5.538 | 46.472  | 5.538  |
| GNLY   | UDT    |         | UDT    |         |        |         |        |
| FAS    | 30.469 | -4.534  | 30.304 | -0.987  | -3.547 | 11.690  | 3.547  |
| FASLG  | UDT    |         | UDT    |         |        |         |        |
| TGFB1  | 26.213 | -0.279  | 24.894 | 4.423   | -4.702 | 26.030  | 4.702  |
| SMAD3  | 28.719 | -2.784  | 28.396 | 0.921   | -3.705 | 13.043  | 3.705  |
| SMAD7  | 28.927 | -2.992  | 28.559 | 0.758   | -3.750 | 13.453  | 3.750  |
| SKI    | 24.155 | 1.779   | 25.644 | 3.673   | -1.894 | 3.717   | 1.894  |
| FN1    | 23.783 | 2.151   | 22.398 | 6.919   | -4.768 | 27.247  | 4.768  |
| C3     | 28.306 | -2.372  | 25.715 | 3.602   | -5.973 | 62.833  | 5.973  |
| TNF    | 36.932 | -10.997 | 32.780 | -3.463  | -7.535 | 185.405 | 7.535  |
| LTA    | 36.294 | -10.359 | 35.222 | -5.904  | -4.455 | 21.930  | 4.455  |
| ACE    | 31.685 | -5.750  | 32.199 | -2.882  | -2.868 | 7.303   | 2.868  |
| VEGFA  | 26.794 | -0.859  | 28.286 | 1.031   | -1.890 | 3.707   | 1.890  |
| CD34   | 32.341 | -6.406  | 31.857 | -2.539  | -3.867 | 14.592  | 3.867  |
| AGTR1  | 41.000 | -15.065 | 41.000 | -11.683 | -3.383 | 10.431  | 3.383  |
| AGTR2  | 33.363 | -7.428  | 30.848 | -1.531  | -5.897 | 59.593  | 5.897  |
| EDN1   | 30.832 | -4.897  | 29.578 | -0.261  | -4.636 | 24.868  | 4.636  |
| LIF    | 32.307 | -6.372  | 28.242 | 1.075   | -7.447 | 174.515 | 7.447  |
| LY96   | 33.730 | -7.796  | 32.708 | -3.391  | -4.405 | 21.180  | 4.405  |
| MIF    | 20.263 | 5.671   | 21.299 | 8.019   | -2.347 | 5.088   | 2.347  |
| NFATC3 | 26.453 | -0.519  | 26.465 | 2.852   | -3.371 | 10.347  | 3.371  |
| NFATC4 | 29.433 | -3.499  | 28.665 | 0.652   | -4.151 | 17.769  | 4.151  |
| PF4    | 41.000 | -15.065 | 35.909 | -6.591  | -8.474 | 355.584 | 8.474  |
| SYK    | 31.194 | -5.260  | 30.376 | -1.059  | -4.201 | 18.392  | 4.201  |
| 18S    | 17.040 |         | 13.717 |         |        |         |        |
| GUSB   | 29.611 |         | 26.568 |         |        |         |        |
| HPRT1  | 29.974 | -0.363  | 27.704 | -1.136  | 0.773  | 0.585   | -0.773 |
| GAPDH  | 24.177 | 5.434   | 22.247 | 4.321   | 1.113  | 0.462   | -1.113 |
| ABCA1  | 30.755 | -1.144  | 27.724 | -1.156  | 0.012  | 0.991   | -0.012 |
| ADAM10 | 28.541 | 1.071   | 25.861 | 0.707   | 0.364  | 0.777   | -0.364 |
| ADAM17 | 29.957 | -0.345  | 27.438 | -0.870  | 0.524  | 0.695   | -0.524 |

|          |        |        |        |        |        |       |        |
|----------|--------|--------|--------|--------|--------|-------|--------|
| ADAM9    | 25.767 | 3.845  | 23.335 | 3.233  | 0.612  | 0.654 | -0.612 |
| APBA1    | 28.323 | 1.289  | 27.853 | -1.285 | 2.573  | 0.168 | -2.573 |
| APBA2    | 29.469 | 0.142  | 28.970 | -2.401 | 2.544  | 0.171 | -2.544 |
| APBA3    | 31.592 | -1.981 | 29.356 | -2.787 | 0.807  | 0.572 | -0.807 |
| APBB1    | 28.080 | 1.531  | 26.765 | -0.196 | 1.727  | 0.302 | -1.727 |
| APBB2    | 28.964 | 0.648  | 27.200 | -0.632 | 1.279  | 0.412 | -1.279 |
| APBB3    | 33.339 | -3.728 | 30.856 | -4.288 | 0.560  | 0.678 | -0.560 |
| APCS     | UDT    |        | UDT    |        |        |       |        |
| APH1A    | 28.879 | 0.732  | 25.708 | 0.860  | -0.128 | 1.093 | 0.128  |
| APH1B    | 28.414 | 1.197  | 26.397 | 0.171  | 1.026  | 0.491 | -1.026 |
| APLP1    | 29.303 | 0.308  | 28.392 | -1.824 | 2.132  | 0.228 | -2.132 |
| APLP2    | 26.288 | 3.324  | 25.127 | 1.442  | 1.882  | 0.271 | -1.882 |
| APOE     | 26.450 | 3.161  | 24.510 | 2.059  | 1.103  | 0.466 | -1.103 |
| APP      | 21.792 | 7.820  | 20.806 | 5.762  | 2.058  | 0.240 | -2.058 |
| BACE1    | 27.974 | 1.637  | 26.949 | -0.381 | 2.018  | 0.247 | -2.018 |
| BACE2    | 25.937 | 3.675  | 24.270 | 2.299  | 1.376  | 0.385 | -1.376 |
| CAPN1    | 27.813 | 1.798  | 26.721 | -0.153 | 1.951  | 0.259 | -1.951 |
| CASP3    | 30.874 | -1.263 | 28.933 | -2.365 | 1.103  | 0.466 | -1.103 |
| CASP6    | 30.816 | -1.204 | 27.531 | -0.963 | -0.242 | 1.182 | 0.242  |
| CDC2     | 31.796 | -2.185 | 28.746 | -2.178 | -0.007 | 1.005 | 0.007  |
| CDK5     | 29.165 | 0.446  | 27.512 | -0.944 | 1.390  | 0.382 | -1.390 |
| CDK5R1   | 26.644 | 2.968  | 26.342 | 0.226  | 2.742  | 0.150 | -2.742 |
| SLC18A3  | 32.214 | -2.603 | 30.672 | -4.103 | 1.500  | 0.353 | -1.500 |
| CSNK1A1  | 27.723 | 1.889  | 26.998 | -0.430 | 2.319  | 0.200 | -2.319 |
| CTSB     | 25.676 | 3.935  | 23.868 | 2.700  | 1.235  | 0.425 | -1.235 |
| CTSC     | 25.901 | 3.711  | 24.015 | 2.553  | 1.158  | 0.448 | -1.158 |
| CTSD     | 28.517 | 1.094  | 25.902 | 0.666  | 0.429  | 0.743 | -0.429 |
| CTSG     | UDT    |        | UDT    |        |        |       |        |
| BPTF     | 27.691 | 1.921  | 26.540 | 0.029  | 1.892  | 0.269 | -1.892 |
| GJB1     | 33.510 | -3.899 | 27.844 | -1.276 | -2.623 | 6.160 | 2.623  |
| GLS      | 28.279 | 1.333  | 27.666 | -1.098 | 2.431  | 0.185 | -2.431 |
| GRIN1    | 25.319 | 4.292  | 25.904 | 0.664  | 3.629  | 0.081 | -3.629 |
| GRIN2A   | 28.312 | 1.299  | 28.594 | -2.026 | 3.326  | 0.100 | -3.326 |
| GRIN2B   | 26.804 | 2.807  | 27.666 | -1.098 | 3.905  | 0.067 | -3.905 |
| GRIN2D   | 27.508 | 2.103  | 27.559 | -0.990 | 3.094  | 0.117 | -3.094 |
| GSK3B    | 24.337 | 5.274  | 24.018 | 2.550  | 2.724  | 0.151 | -2.724 |
| HSD17B10 | 26.251 | 3.361  | 26.386 | 0.182  | 3.178  | 0.110 | -3.178 |
| IDE      | 28.205 | 1.406  | 29.357 | -2.788 | 4.194  | 0.055 | -4.194 |
| IFNG     | UDT    |        | UDT    |        |        |       |        |

|          |        |        |        |        |        |       |        |
|----------|--------|--------|--------|--------|--------|-------|--------|
| IL1A     | 33.345 | -3.734 | 30.507 | -3.939 | 0.205  | 0.867 | -0.205 |
| IL1B     | 33.710 | -4.099 | 30.430 | -3.862 | -0.237 | 1.178 | 0.237  |
| IL6      | 34.696 | -5.085 | 31.522 | -4.954 | -0.131 | 1.095 | 0.131  |
| INS      | 37.098 | -7.487 | 33.078 | -6.510 | -0.977 | 1.968 | 0.977  |
| INSR     | 29.899 | -0.288 | 29.337 | -2.769 | 2.481  | 0.179 | -2.481 |
| LRP1     | 25.850 | 3.762  | 25.255 | 1.313  | 2.449  | 0.183 | -2.449 |
| LRP2     | 31.533 | -1.922 | 29.813 | -3.245 | 1.324  | 0.400 | -1.324 |
| LRPAP1   | 26.140 | 3.471  | 26.979 | -0.410 | 3.882  | 0.068 | -3.882 |
| MAPK1    | 26.430 | 3.181  | 26.554 | 0.014  | 3.167  | 0.111 | -3.167 |
| MAPK3    | 25.958 | 3.653  | 25.876 | 0.692  | 2.961  | 0.128 | -2.961 |
| MAPT     | 21.908 | 7.703  | 24.007 | 2.561  | 5.143  | 0.028 | -5.143 |
| MME      | 30.290 | -0.678 | 28.025 | -1.457 | 0.778  | 0.583 | -0.778 |
| NCSTN    | 26.632 | 2.979  | 26.759 | -0.191 | 3.170  | 0.111 | -3.170 |
| PDE8B    | 31.316 | -1.704 | 31.963 | -5.395 | 3.691  | 0.077 | -3.691 |
| PSENEN   | 30.940 | -1.329 | 30.820 | -4.252 | 2.923  | 0.132 | -2.923 |
| PLD1     | 30.844 | -1.232 | 29.824 | -3.256 | 2.023  | 0.246 | -2.023 |
| PPP2CA   | 26.482 | 3.129  | 27.376 | -0.808 | 3.938  | 0.065 | -3.938 |
| PRKACB   | 27.797 | 1.815  | 28.668 | -2.100 | 3.915  | 0.066 | -3.915 |
| PRKCA    | 27.415 | 2.196  | 29.308 | -2.740 | 4.936  | 0.033 | -4.936 |
| PRKCB    | 25.950 | 3.661  | 28.985 | -2.417 | 6.078  | 0.015 | -6.078 |
| PRKCE    | 29.305 | 0.307  | 30.921 | -4.352 | 4.659  | 0.040 | -4.659 |
| PRKCG    | 28.793 | 0.819  | 31.908 | -5.340 | 6.159  | 0.014 | -6.159 |
| PKN1     | 24.437 | 5.174  | 26.669 | -0.101 | 5.275  | 0.026 | -5.275 |
| PSEN1    | 27.528 | 2.084  | 28.668 | -2.100 | 4.183  | 0.055 | -4.183 |
| PSEN2    | 30.881 | -1.269 | 31.133 | -4.565 | 3.296  | 0.102 | -3.296 |
| SERPINA3 | 24.698 | 4.913  | 23.956 | 2.612  | 2.301  | 0.203 | -2.301 |
| SNCA     | 24.339 | 5.273  | 26.813 | -0.245 | 5.518  | 0.022 | -5.518 |
| SOAT1    | 29.900 | -0.289 | 30.352 | -3.784 | 3.495  | 0.089 | -3.495 |
| SOD2     | 24.152 | 5.460  | 24.590 | 1.978  | 3.481  | 0.090 | -3.481 |
| CAPNS2   | 30.751 | -1.140 | 31.733 | -5.165 | 4.025  | 0.061 | -4.025 |
| TNF      | 34.407 | -4.796 | 34.430 | -7.862 | 3.066  | 0.119 | -3.066 |
| UCHL1    | 23.404 | 6.207  | 26.828 | -0.259 | 6.466  | 0.011 | -6.466 |
| VSNL1    | 28.551 | 1.060  | 33.327 | -6.759 | 7.818  | 0.004 | -7.818 |
| GAL      | 29.532 | 0.079  | 30.895 | -4.326 | 4.406  | 0.047 | -4.406 |
| ACHE     | 25.986 | 3.626  | 29.944 | -3.375 | 7.001  | 0.008 | -7.001 |
| AGER     | 33.569 | -3.957 | 33.062 | -6.494 | 2.537  | 0.172 | -2.537 |
| NAE1     | 29.471 | 0.141  | 30.334 | -3.765 | 3.906  | 0.067 | -3.906 |
| BCHE     | 33.601 | -3.989 | 35.674 | -9.106 | 5.117  | 0.029 | -5.117 |
| CAPNS1   | 24.751 | 4.861  | 25.683 | 0.886  | 3.975  | 0.064 | -3.975 |
| CHRNA7   | 29.695 | -0.084 | 30.743 | -4.174 | 4.091  | 0.059 | -4.091 |

|         |        |        |        |         |        |       |         |
|---------|--------|--------|--------|---------|--------|-------|---------|
| CSNK1D  | 23.968 | 5.644  | 26.147 | 0.421   | 5.222  | 0.027 | -5.222  |
| CYP46A1 | 34.434 | -4.823 | 41.000 | -14.432 | 9.609  | 0.001 | -9.609  |
| GAP43   | 24.446 | 5.165  | 28.034 | -1.466  | 6.631  | 0.010 | -6.631  |
| GRIN2C  | 31.206 | -1.595 | 41.000 | -14.432 | 12.837 | 0.000 | -12.837 |
| SLC30A3 | 38.335 | -8.723 | 41.000 | -14.432 | 5.708  | 0.019 | -5.708  |
| ST6GAL1 | 29.525 | 0.086  | 32.496 | -5.928  | 6.014  | 0.015 | -6.014  |
| UBQLN1  | 24.513 | 5.098  | 28.783 | -2.215  | 7.313  | 0.006 | -7.313  |

**Table S3.** Gene expression data and analysis for non-PD organoids and PD organoids infected with CHIKV obtained 14 days post inoculation. UDT: undetermined

|                | non-PD | DCt    | PD<br>CHIKV | DCt    | DDCt   | fold<br>change | log<br>fold<br>change |
|----------------|--------|--------|-------------|--------|--------|----------------|-----------------------|
| Gene<br>Symbol | CT     |        | CT          |        |        |                |                       |
| 18S            | 4.024  |        | 16.565      |        |        |                |                       |
| GUSB           | 22.349 |        | 27.891      |        |        |                |                       |
| HPRT1          | 21.835 |        | 28.859      |        |        |                |                       |
| GAPDH          | 16.749 |        | 23.526      |        |        |                |                       |
| ABAT           | 22.019 | 0.330  | 27.652      | 0.239  | 0.091  | 0.939          | -0.091                |
| ACHE           | 25.873 | -3.523 | 32.699      | -4.808 | 1.285  | 0.410          | -1.285                |
| BSN            | 27.771 | -5.421 | 33.529      | -5.639 | 0.217  | 0.860          | -0.217                |
| CHAT           | 31.140 | -8.790 | 32.772      | -4.881 | -3.909 | 15.021         | 3.909                 |
| CHRM1          | 30.327 | -7.978 | 35.210      | -7.319 | -0.659 | 1.579          | 0.659                 |
| CHRM2          | 26.637 | -4.287 | 30.496      | -2.605 | -1.682 | 3.209          | 1.682                 |
| CHRM3          | 24.891 | -2.541 | 33.300      | -5.409 | 2.868  | 0.137          | -2.868                |
| CHRM4          | 25.924 | -3.574 | 32.125      | -4.234 | 0.660  | 0.633          | -0.660                |
| CHRM5          | 28.195 | -5.845 | 33.617      | -5.727 | -0.119 | 1.086          | 0.119                 |
| CHRNA2         | 31.187 | -8.838 | 33.569      | -5.679 | -3.159 | 8.933          | 3.159                 |
| CHRNA3         | 27.334 | -4.985 | 31.535      | -3.644 | -1.341 | 2.532          | 1.341                 |
| CHRNA4         | 28.765 | -6.416 | 30.347      | -2.457 | -3.959 | 15.553         | 3.959                 |
| CHRNA5         | 27.223 | -4.874 | 32.700      | -4.809 | -0.065 | 1.046          | 0.065                 |
| CHRNA6         | 28.147 | -5.797 | 33.552      | -5.662 | -0.136 | 1.099          | 0.136                 |
| CHRNA6         | 27.406 | -5.056 | 30.712      | -2.821 | -2.235 | 4.709          | 2.235                 |
| CHRNA6         | 28.456 | -6.107 | 34.036      | -6.145 | 0.038  | 0.974          | -0.038                |
| CHRNA6         | 25.612 | -3.263 | 29.375      | -1.485 | -1.778 | 3.430          | 1.778                 |
| CHRNA6         | 30.959 | -8.610 | 31.779      | -3.889 | -4.721 | 26.376         | 4.721                 |
| CHRNA6         | 28.223 | -5.874 | 36.525      | -8.635 | 2.760  | 0.148          | -2.760                |
| CHRNA6         | 21.685 | 0.664  | 32.470      | -4.579 | 5.243  | 0.026          | -5.243                |
| CHRNA6         | 27.547 | -5.198 | 32.332      | -4.441 | -0.757 | 1.690          | 0.757                 |

|         |        |         |        |         |        |         |        |
|---------|--------|---------|--------|---------|--------|---------|--------|
| DRD2    | 25.649 | -3.300  | 31.010 | -3.119  | -0.181 | 1.133   | 0.181  |
| DRD3    | 36.286 | -13.937 | 41.000 | -13.109 | -0.828 | 1.775   | 0.828  |
| GABBR1  | 22.526 | -0.177  | 25.862 | 2.029   | -2.206 | 4.613   | 2.206  |
| GABRA1  | 29.916 | -7.566  | 34.206 | -6.315  | -1.251 | 2.380   | 1.251  |
| GABRA2  | 33.256 | -10.907 | 35.238 | -7.348  | -3.560 | 11.790  | 3.560  |
| GABRA4  | 33.197 | -10.847 | 35.484 | -7.593  | -3.254 | 9.542   | 3.254  |
| GABRA5  | 28.907 | -6.558  | 30.221 | -2.330  | -4.228 | 18.742  | 4.228  |
| GABRA6  | 36.795 | -14.446 | 41.000 | -13.109 | -1.337 | 2.526   | 1.337  |
| GABRB1  | 27.857 | -5.507  | 32.454 | -4.563  | -0.944 | 1.924   | 0.944  |
| GABRB2  | 26.008 | -3.659  | 34.744 | -6.853  | 3.194  | 0.109   | -3.194 |
| GABRB3  | 24.540 | -2.190  | 30.497 | -2.606  | 0.416  | 0.750   | -0.416 |
| GABRD   | 29.867 | -7.518  | 35.923 | -8.033  | 0.514  | 0.700   | -0.514 |
| GABRE   | 26.860 | -4.511  | 30.511 | -2.620  | -1.891 | 3.709   | 1.891  |
| GABRG1  | 31.466 | -9.117  | 34.730 | -6.840  | -2.277 | 4.848   | 2.277  |
| GABRG2  | 27.734 | -5.385  | 30.851 | -2.960  | -2.425 | 5.371   | 2.425  |
| GABRG3  | 29.898 | -7.548  | 33.147 | -5.256  | -2.292 | 4.899   | 2.292  |
| GABRP   | 19.753 | 2.596   | 34.391 | -6.501  | 9.097  | 0.002   | -9.097 |
| GABRQ   | 26.148 | -3.799  | 29.819 | -1.928  | -1.870 | 3.656   | 1.870  |
| GABRR1  | 31.249 | -8.899  | 36.634 | -8.743  | -0.156 | 1.114   | 0.156  |
| GABRR2  | 28.487 | -6.138  | 34.463 | -6.572  | 0.434  | 0.740   | -0.434 |
| GAD1    | 26.516 | -4.167  | 31.970 | -4.080  | -0.088 | 1.063   | 0.088  |
| GCH1    | 27.301 | -4.952  | 32.409 | -4.518  | -0.434 | 1.351   | 0.434  |
| GLRA1   | 29.351 | -7.001  | 30.983 | -3.093  | -3.909 | 15.020  | 3.909  |
| GLRA2   | 29.577 | -7.228  | 27.889 | 0.002   | -7.230 | 150.076 | 7.230  |
| GLRA3   | 31.454 | -9.104  | 31.165 | -3.274  | -5.830 | 56.885  | 5.830  |
| GLRB    | 25.426 | -3.077  | 29.358 | -1.467  | -1.610 | 3.053   | 1.610  |
| GRIA1   | 27.155 | -4.806  | 27.188 | 0.703   | -5.509 | 45.527  | 5.509  |
| GRIK4   | 30.909 | -8.560  | 33.486 | -5.595  | -2.965 | 7.807   | 2.965  |
| HTR1B   | 25.922 | -3.572  | 31.236 | -3.345  | -0.227 | 1.171   | 0.227  |
| HTR1E   | 25.996 | -3.646  | 31.614 | -3.723  | 0.077  | 0.948   | -0.077 |
| HTR2A   | 27.635 | -5.286  | 29.740 | -1.849  | -3.437 | 10.827  | 3.437  |
| HTR3A   | 32.637 | -10.288 | 31.314 | -3.423  | -6.865 | 116.528 | 6.865  |
| HTR3B   | 39.939 | -17.590 | 41.000 | -13.109 | -4.481 | 22.329  | 4.481  |
| HTR7    | 28.161 | -5.811  | 36.188 | -8.298  | 2.486  | 0.178   | -2.486 |
| MAOA    | 20.656 | 1.694   | 28.404 | -0.513  | 2.207  | 0.217   | -2.207 |
| PHOX2A  | 29.938 | -7.588  | 31.973 | -4.082  | -3.506 | 11.361  | 3.506  |
| RIMS1   | 29.683 | -7.334  | 34.553 | -6.663  | -0.671 | 1.592   | 0.671  |
| RIMS3   | 27.063 | -4.713  | 31.719 | -3.829  | -0.885 | 1.847   | 0.885  |
| RIMS4   | 24.171 | -1.822  | 27.578 | 0.313   | -2.135 | 4.391   | 2.135  |
| SLC18A2 | 27.918 | -5.569  | 32.329 | -4.438  | -1.131 | 2.190   | 1.131  |
| SLC18A3 | 28.925 | -6.576  | 30.856 | -2.965  | -3.610 | 12.213  | 3.610  |

|         |        |         |        |         |        |        |         |
|---------|--------|---------|--------|---------|--------|--------|---------|
| SLC1A3  | 22.752 | -0.402  | 24.873 | 3.018   | -3.420 | 10.702 | 3.420   |
| SLC32A1 | 32.869 | -10.520 | 41.000 | -13.109 | 2.589  | 0.166  | -2.589  |
| SLC5A7  | 26.900 | -4.550  | 28.373 | -0.482  | -4.068 | 16.777 | 4.068   |
| SLC6A1  | 29.817 | -7.468  | 32.843 | -4.953  | -2.515 | 5.716  | 2.515   |
| SLC6A11 | 25.801 | -3.452  | 33.219 | -5.328  | 1.877  | 0.272  | -1.877  |
| SLC6A12 | 27.546 | -5.197  | 34.648 | -6.757  | 1.560  | 0.339  | -1.560  |
| SLC6A13 | 31.415 | -9.066  | 37.453 | -9.562  | 0.496  | 0.709  | -0.496  |
| SLC6A15 | 25.256 | -2.907  | 30.466 | -2.575  | -0.332 | 1.259  | 0.332   |
| SLC6A16 | 37.044 | -14.695 | 36.867 | -8.976  | -5.719 | 52.666 | 5.719   |
| SLC6A18 | 35.747 | -13.398 | 41.000 | -13.109 | -0.289 | 1.222  | 0.289   |
| SLC6A2  | 29.022 | -6.672  | 37.711 | -9.821  | 3.148  | 0.113  | -3.148  |
| SLC6A20 | 28.239 | -5.890  | 33.407 | -5.516  | -0.374 | 1.296  | 0.374   |
| SLC6A4  | 24.688 | -2.339  | 36.171 | -8.280  | 5.941  | 0.016  | -5.941  |
| SLC6A5  | 29.312 | -6.963  | 35.186 | -7.295  | 0.333  | 0.794  | -0.333  |
| SLC6A6  | 24.076 | -1.726  | 29.763 | -1.872  | 0.146  | 0.904  | -0.146  |
| SLC6A7  | 33.942 | -11.593 | 41.000 | -13.109 | 1.516  | 0.350  | -1.516  |
| SLC6A8  | 21.614 | 0.736   | 27.658 | 0.233   | 0.503  | 0.706  | -0.503  |
| SLC6A9  | 28.075 | -5.726  | 41.000 | -13.109 | 7.384  | 0.006  | -7.384  |
| SNPH    | 24.745 | -2.396  | 41.000 | -13.109 | 10.714 | 0.001  | -10.714 |
| STX1A   | 25.476 | -3.126  | 33.485 | -5.594  | 2.467  | 0.181  | -2.467  |
| STX1B   | 24.932 | -2.582  | 34.159 | -6.268  | 3.685  | 0.078  | -3.685  |
| STX3    | 23.130 | -0.781  | 32.384 | -4.493  | 3.712  | 0.076  | -3.712  |
| STXBP1  | 22.473 | -0.124  | 30.438 | -2.547  | 2.423  | 0.186  | -2.423  |
| SV2A    | 22.870 | -0.520  | 31.799 | -3.909  | 3.388  | 0.096  | -3.388  |
| SYN1    | 25.416 | -3.067  | 32.353 | -4.462  | 1.395  | 0.380  | -1.395  |
| SYN2    | 24.842 | -2.493  | 32.353 | -4.462  | 1.970  | 0.255  | -1.970  |
| SYN3    | 25.811 | -3.462  | 32.501 | -4.611  | 1.149  | 0.451  | -1.149  |
| SYP     | 23.301 | -0.951  | 30.963 | -3.072  | 2.121  | 0.230  | -2.121  |
| SYT1    | 24.036 | -1.687  | 32.535 | -4.644  | 2.958  | 0.129  | -2.958  |
| TPH1    | 21.969 | 0.380   | 31.888 | -3.997  | 4.377  | 0.048  | -4.377  |
| 18S     | 4.418  |         | 16.386 |         |        |        |         |
| GUSB    | 23.498 |         | 29.317 |         |        |        |         |
| HPRT1   | 23.007 |         | 30.427 |         |        |        |         |
| GAPDH   | 18.410 |         | 24.668 |         |        |        |         |
| IL1A    | 26.294 | -2.795  | 31.867 | -2.549  | -0.246 | 1.186  | 0.246   |
| IL1B    | 25.902 | -2.404  | 31.447 | -2.129  | -0.275 | 1.210  | 0.275   |
| IL2     | 37.521 | -14.022 | 41.000 | -11.683 | -2.339 | 5.061  | 2.339   |
| IL3     | UDT    |         | UDT    |         |        |        |         |
| IL4     | UDT    |         | UDT    |         |        |        |         |
| IL5     | 36.911 | -13.413 | 36.810 | -7.493  | -5.920 | 60.534 | 5.920   |
| IL6     | 28.923 | -5.425  | 31.676 | -2.359  | -3.066 | 8.375  | 3.066   |

|        |        |         |        |         |         |          |        |
|--------|--------|---------|--------|---------|---------|----------|--------|
| IL7    | 29.994 | -6.496  | 32.541 | -3.223  | -3.273  | 9.665    | 3.273  |
| IL8    | 23.324 | 0.174   | 28.371 | 0.947   | -0.773  | 1.708    | 0.773  |
| IL9    | 36.586 | -13.088 | 41.000 | -11.683 | -1.405  | 2.648    | 1.405  |
| IL10   | 29.127 | -5.629  | 33.155 | -3.838  | -1.791  | 3.460    | 1.791  |
| IL12A  | 31.476 | -7.977  | 34.378 | -5.061  | -2.917  | 7.551    | 2.917  |
| IL12B  | 36.211 | -12.713 | 41.000 | -11.683 | -1.030  | 2.042    | 1.030  |
| IL13   | 37.285 | -13.786 | 41.000 | -11.683 | -2.104  | 4.298    | 2.104  |
| IL15   | 31.824 | -8.326  | 36.154 | -6.836  | -1.490  | 2.808    | 1.490  |
| IL17A  | UDT    |         | UDT    |         |         |          |        |
| IL18   | 30.782 | -7.284  | 36.352 | -7.035  | -0.249  | 1.189    | 0.249  |
| CCL3   | 31.202 | -7.704  | 24.971 | 4.346   | -12.050 | 4239.804 | 12.050 |
| CCL19  | 30.937 | -7.438  | 28.579 | 0.739   | -8.177  | 289.368  | 8.177  |
| CCL2   | 22.749 | 0.750   | 25.861 | 3.456   | -2.706  | 6.527    | 2.706  |
| CCL5   | 29.127 | -5.629  | 29.416 | -0.099  | -5.530  | 46.203   | 5.530  |
| CCR2   | 38.102 | -14.604 | 41.000 | -11.683 | -2.921  | 7.575    | 2.921  |
| CCR4   | 30.485 | -6.987  | 32.743 | -3.425  | -3.561  | 11.804   | 3.561  |
| CCR5   | 34.342 | -10.844 | 34.000 | -4.682  | -6.161  | 71.563   | 6.161  |
| CCR7   | 29.918 | -6.420  | 35.893 | -6.576  | 0.156   | 0.897    | -0.156 |
| CXCR3  | 34.716 | -11.217 | 41.000 | -11.683 | 0.465   | 0.724    | -0.465 |
| CXCL10 | 27.561 | -4.063  | 25.886 | 3.432   | -7.495  | 180.338  | 7.495  |
| CXCL11 | 28.559 | -5.060  | 27.641 | 1.677   | -6.737  | 106.647  | 6.737  |
| CSF1   | 23.859 | -0.360  | 27.029 | 2.289   | -2.649  | 6.273    | 2.649  |
| CSF2   | 30.007 | -6.508  | 35.262 | -5.945  | -0.564  | 1.478    | 0.564  |
| CSF3   | 28.321 | -4.823  | 34.405 | -5.088  | 0.265   | 0.832    | -0.265 |
| STAT3  | 21.286 | 2.213   | 24.523 | 4.794   | -2.581  | 5.985    | 2.581  |
| NFKB2  | 24.020 | -0.521  | 28.233 | 1.084   | -1.606  | 3.044    | 1.606  |
| IKBKB  | 24.590 | -1.092  | 33.437 | -4.120  | 3.028   | 0.123    | -3.028 |
| CD3E   | 32.383 | -8.884  | 41.000 | -11.683 | 2.798   | 0.144    | -2.798 |
| CD4    | 28.869 | -5.370  | 30.220 | -0.902  | -4.468  | 22.132   | 4.468  |
| CD8A   | 28.828 | -5.330  | 29.450 | -0.133  | -5.197  | 36.678   | 5.197  |
| CD19   | 36.392 | -12.893 | 41.000 | -11.683 | -1.210  | 2.314    | 1.210  |
| IL2RA  | 34.444 | -10.946 | 30.578 | -1.261  | -9.685  | 823.051  | 9.685  |
| CD28   | 34.856 | -11.358 | 30.558 | -1.241  | -10.117 | 1110.698 | 10.117 |
| CD38   | 32.191 | -8.693  | 31.756 | -2.439  | -6.254  | 76.339   | 6.254  |
| CD40   | 26.560 | -3.062  | 28.813 | 0.504   | -3.566  | 11.843   | 3.566  |
| PTPRC  | 32.506 | -9.008  | 29.612 | -0.294  | -8.713  | 419.686  | 8.713  |
| CD68   | 23.904 | -0.405  | 23.530 | 5.788   | -6.193  | 73.170   | 6.193  |
| CD80   | 33.718 | -10.220 | 34.401 | -5.084  | -5.136  | 35.154   | 5.136  |
| CD86   | 34.604 | -11.106 | 32.742 | -3.424  | -7.681  | 205.243  | 7.681  |
| CTLA4  | 34.564 | -11.065 | 39.481 | -10.164 | -0.902  | 1.868    | 0.902  |
| CD40LG | 39.231 | -15.732 | 41.000 | -11.683 | -4.050  | 16.559   | 4.050  |

|          |        |         |        |         |        |         |        |
|----------|--------|---------|--------|---------|--------|---------|--------|
| HLA-DRA  | 30.344 | -6.846  | 29.706 | -0.389  | -6.457 | 87.851  | 6.457  |
| HLA-DRB1 | UDT    |         | UDT    |         |        |         |        |
| TBX21    | 31.993 | -8.495  | 35.355 | -6.038  | -2.457 | 5.491   | 2.457  |
| TNFRSF18 | 30.559 | -7.060  | 35.437 | -6.119  | -0.941 | 1.920   | 0.941  |
| ICOS     | 36.160 | -12.662 | 38.918 | -9.601  | -3.061 | 8.346   | 3.061  |
| NOS2     | 31.609 | -8.111  | 33.290 | -3.973  | -4.138 | 17.605  | 4.138  |
| BCL2     | 24.410 | -0.912  | 28.591 | 0.726   | -1.638 | 3.112   | 1.638  |
| BCL2L1   | 26.495 | -2.997  | 30.875 | -1.558  | -1.439 | 2.711   | 1.439  |
| BAX      | 21.558 | 1.940   | 25.836 | 3.481   | -1.540 | 2.909   | 1.540  |
| ICAM1    | 24.207 | -0.708  | 28.615 | 0.703   | -1.411 | 2.659   | 1.411  |
| SELP     | 29.187 | -5.689  | 35.572 | -6.255  | 0.566  | 0.675   | -0.566 |
| SELE     | 28.415 | -4.916  | 34.787 | -5.470  | 0.554  | 0.681   | -0.554 |
| HMOX1    | 23.861 | -0.363  | 28.658 | 0.660   | -1.022 | 2.031   | 1.022  |
| PTGS2    | 24.462 | -0.964  | 30.188 | -0.871  | -0.093 | 1.066   | 0.093  |
| LRP2     | 30.028 | -6.529  | 30.431 | -1.114  | -5.416 | 42.685  | 5.416  |
| CYP1A2   | UDT    |         | UDT    |         |        |         |        |
| CYP7A1   | 33.329 | -9.830  | 41.000 | -11.683 | 1.852  | 0.277   | -1.852 |
| IFNG     | UDT    |         | UDT    |         |        |         |        |
| PRF1     | 34.518 | -11.020 | 37.594 | -8.277  | -2.743 | 6.695   | 2.743  |
| GZMB     | 36.465 | -12.967 | 33.517 | -4.200  | -8.767 | 435.623 | 8.767  |
| GNLY     | UDT    |         | UDT    |         |        |         |        |
| FAS      | 24.398 | -0.899  | 30.304 | -0.987  | 0.088  | 0.941   | -0.088 |
| FASLG    | UDT    |         | UDT    |         |        |         |        |
| TGFB1    | 22.243 | 1.256   | 24.894 | 4.423   | -3.168 | 8.986   | 3.168  |
| SMAD3    | 23.706 | -0.207  | 28.396 | 0.921   | -1.128 | 2.186   | 1.128  |
| SMAD7    | 24.199 | -0.701  | 28.559 | 0.758   | -1.459 | 2.748   | 1.459  |
| SKI      | 21.226 | 2.272   | 25.644 | 3.673   | -1.401 | 2.641   | 1.401  |
| FN1      | 16.018 | 7.481   | 22.398 | 6.919   | 0.561  | 0.678   | -0.561 |
| C3       | 21.407 | 2.091   | 25.715 | 3.602   | -1.511 | 2.850   | 1.511  |
| TNF      | 29.850 | -6.352  | 32.780 | -3.463  | -2.889 | 7.409   | 2.889  |
| LTA      | 33.964 | -10.465 | 35.222 | -5.904  | -4.561 | 23.601  | 4.561  |
| ACE      | 28.256 | -4.757  | 32.199 | -2.882  | -1.876 | 3.670   | 1.876  |
| VEGFA    | 23.275 | 0.224   | 28.286 | 1.031   | -0.807 | 1.750   | 0.807  |
| CD34     | 28.925 | -5.426  | 31.857 | -2.539  | -2.887 | 7.397   | 2.887  |
| AGTR1    | 32.417 | -8.918  | 41.000 | -11.683 | 2.764  | 0.147   | -2.764 |
| AGTR2    | 30.021 | -6.522  | 30.848 | -1.531  | -4.991 | 31.806  | 4.991  |
| EDN1     | 23.585 | -0.087  | 29.578 | -0.261  | 0.174  | 0.886   | -0.174 |
| LIF      | 23.354 | 0.145   | 28.242 | 1.075   | -0.931 | 1.906   | 0.931  |
| LY96     | 28.819 | -5.320  | 32.708 | -3.391  | -1.929 | 3.808   | 1.929  |
| MIF      | 18.354 | 5.144   | 21.299 | 8.019   | -2.874 | 7.332   | 2.874  |
| NFATC3   | 23.310 | 0.188   | 26.465 | 2.852   | -2.664 | 6.338   | 2.664  |

|         |        |        |        |        |        |        |        |
|---------|--------|--------|--------|--------|--------|--------|--------|
| NFATC4  | 23.702 | -0.204 | 28.665 | 0.652  | -0.856 | 1.810  | 0.856  |
| PF4     | 32.745 | -9.246 | 35.909 | -6.591 | -2.655 | 6.297  | 2.655  |
| SYK     | 25.367 | -1.869 | 30.376 | -1.059 | -0.810 | 1.754  | 0.810  |
| 18S     | 4.975  |        | 13.717 |        |        |        |        |
| GUSB    | 24.178 |        | 26.568 |        |        |        |        |
| HPRT1   | 23.756 |        | 27.704 |        |        |        |        |
| GAPDH   | 18.910 |        | 22.247 |        |        |        |        |
| ABCA1   | 22.968 | 1.211  | 27.724 | -1.156 | 2.367  | 0.194  | -2.367 |
| ADAM10  | 21.874 | 2.304  | 25.861 | 0.707  | 1.597  | 0.331  | -1.597 |
| ADAM17  | 24.215 | -0.037 | 27.438 | -0.870 | 0.832  | 0.562  | -0.832 |
| ADAM9   | 20.640 | 3.538  | 23.335 | 3.233  | 0.305  | 0.810  | -0.305 |
| APBA1   | 26.612 | -2.434 | 27.853 | -1.285 | -1.149 | 2.218  | 1.149  |
| APBA2   | 27.247 | -3.069 | 28.970 | -2.401 | -0.667 | 1.588  | 0.667  |
| APBA3   | 26.384 | -2.205 | 29.356 | -2.787 | 0.582  | 0.668  | -0.582 |
| APBB1   | 24.973 | -0.795 | 26.765 | -0.196 | -0.599 | 1.514  | 0.599  |
| APBB2   | 23.635 | 0.543  | 27.200 | -0.632 | 1.175  | 0.443  | -1.175 |
| APBB3   | 26.463 | -2.284 | 30.856 | -4.288 | 2.004  | 0.249  | -2.004 |
| APCS    | UDT    |        | UDT    |        |        |        |        |
| APH1A   | 25.096 | -0.918 | 25.708 | 0.860  | -1.778 | 3.430  | 1.778  |
| APH1B   | 24.753 | -0.575 | 26.397 | 0.171  | -0.746 | 1.677  | 0.746  |
| APLP1   | 26.146 | -1.968 | 28.392 | -1.824 | -0.144 | 1.105  | 0.144  |
| APLP2   | 21.738 | 2.440  | 25.127 | 1.442  | 0.999  | 0.500  | -0.999 |
| APOE    | 20.729 | 3.449  | 24.510 | 2.059  | 1.390  | 0.381  | -1.390 |
| APP     | 18.600 | 5.578  | 20.806 | 5.762  | -0.184 | 1.136  | 0.184  |
| BACE1   | 24.263 | -0.085 | 26.949 | -0.381 | 0.296  | 0.815  | -0.296 |
| BACE2   | 22.657 | 1.521  | 24.270 | 2.299  | -0.778 | 1.714  | 0.778  |
| CAPN1   | 21.127 | 3.051  | 26.721 | -0.153 | 3.204  | 0.109  | -3.204 |
| CASP3   | 25.482 | -1.304 | 28.933 | -2.365 | 1.061  | 0.479  | -1.061 |
| CASP6   | 24.998 | -0.819 | 27.531 | -0.963 | 0.143  | 0.905  | -0.143 |
| CDC2    | 25.776 | -1.598 | 28.746 | -2.178 | 0.580  | 0.669  | -0.580 |
| CDK5    | 25.157 | -0.978 | 27.512 | -0.944 | -0.035 | 1.024  | 0.035  |
| CDK5R1  | 25.552 | -1.374 | 26.342 | 0.226  | -1.600 | 3.031  | 1.600  |
| SLC18A3 | 30.740 | -6.562 | 30.672 | -4.103 | -2.459 | 5.498  | 2.459  |
| CHRM1   | 32.370 | -8.192 | 33.041 | -6.473 | -1.719 | 3.292  | 1.719  |
| CHRM3   | 26.739 | -2.560 | 30.713 | -4.145 | 1.584  | 0.333  | -1.584 |
| CHRNA4  | 30.405 | -6.226 | 28.907 | -2.339 | -3.888 | 14.801 | 3.888  |
| CSNK1A1 | 24.199 | -0.021 | 26.998 | -0.430 | 0.409  | 0.753  | -0.409 |
| CTSB    | 20.521 | 3.658  | 23.868 | 2.700  | 0.957  | 0.515  | -0.957 |
| CTSC    | 19.266 | 4.912  | 24.015 | 2.553  | 2.359  | 0.195  | -2.359 |
| CTSD    | 20.005 | 4.173  | 25.902 | 0.666  | 3.507  | 0.088  | -3.507 |
| CTSG    | UDT    |        | UDT    |        |        |        |        |

|          |        |         |        |        |        |        |        |
|----------|--------|---------|--------|--------|--------|--------|--------|
| BPTF     | 23.545 | 0.633   | 26.540 | 0.029  | 0.605  | 0.658  | -0.605 |
| GJB1     | 29.543 | -5.364  | 27.844 | -1.276 | -4.088 | 17.012 | 4.088  |
| GLS      | 23.467 | 0.711   | 27.666 | -1.098 | 1.809  | 0.285  | -1.809 |
| GRIN1    | 27.845 | -3.666  | 25.904 | 0.664  | -4.330 | 20.112 | 4.330  |
| GRIN2A   | 28.442 | -4.263  | 28.594 | -2.026 | -2.237 | 4.715  | 2.237  |
| GRIN2B   | 30.698 | -6.520  | 27.666 | -1.098 | -5.422 | 42.873 | 5.422  |
| GRIN2D   | 24.497 | -0.319  | 27.559 | -0.990 | 0.672  | 0.628  | -0.672 |
| GSK3B    | 23.268 | 0.910   | 24.018 | 2.550  | -1.640 | 3.118  | 1.640  |
| HSD17B10 | 23.409 | 0.769   | 26.386 | 0.182  | 0.587  | 0.666  | -0.587 |
| IDE      | 25.395 | -1.216  | 29.357 | -2.788 | 1.572  | 0.336  | -1.572 |
| IFNG     | UDT    |         | UDT    |        |        |        |        |
| IL1A     | 26.896 | -2.718  | 30.507 | -3.939 | 1.221  | 0.429  | -1.221 |
| IL1B     | 26.574 | -2.396  | 30.430 | -3.862 | 1.466  | 0.362  | -1.466 |
| IL6      | 29.742 | -5.563  | 31.522 | -4.954 | -0.610 | 1.526  | 0.610  |
| INS      | 36.081 | -11.902 | 33.078 | -6.510 | -5.392 | 42.000 | 5.392  |
| INSR     | 24.664 | -0.486  | 29.337 | -2.769 | 2.283  | 0.206  | -2.283 |
| LRP1     | 20.966 | 3.212   | 25.255 | 1.313  | 1.899  | 0.268  | -1.899 |
| LRP2     | 30.842 | -6.664  | 29.813 | -3.245 | -3.419 | 10.695 | 3.419  |
| LRPAP1   | 22.717 | 1.461   | 26.979 | -0.410 | 1.872  | 0.273  | -1.872 |
| MAPK1    | 24.405 | -0.227  | 26.554 | 0.014  | -0.241 | 1.182  | 0.241  |
| MAPK3    | 23.677 | 0.501   | 25.876 | 0.692  | -0.190 | 1.141  | 0.190  |
| MAPT     | 24.924 | -0.746  | 24.007 | 2.561  | -3.307 | 9.896  | 3.307  |
| MME      | 23.724 | 0.455   | 28.025 | -1.457 | 1.912  | 0.266  | -1.912 |
| NCSTN    | 23.617 | 0.561   | 26.759 | -0.191 | 0.752  | 0.594  | -0.752 |
| PDE8B    | 25.386 | -1.208  | 31.963 | -5.395 | 4.187  | 0.055  | -4.187 |
| PSENEN   | 31.480 | -7.302  | 30.820 | -4.252 | -3.050 | 8.281  | 3.050  |
| PLD1     | 24.803 | -0.624  | 29.824 | -3.256 | 2.631  | 0.161  | -2.631 |
| PPP2CA   | 22.875 | 1.304   | 27.376 | -0.808 | 2.112  | 0.231  | -2.112 |
| PRKACB   | 25.885 | -1.707  | 28.668 | -2.100 | 0.393  | 0.761  | -0.393 |
| PRKCA    | 27.197 | -3.018  | 29.308 | -2.740 | -0.279 | 1.213  | 0.279  |
| PRKCB    | 25.911 | -1.733  | 28.985 | -2.417 | 0.684  | 0.622  | -0.684 |
| PRKCE    | 27.441 | -3.263  | 30.921 | -4.352 | 1.090  | 0.470  | -1.090 |
| PRKCG    | 30.863 | -6.685  | 31.908 | -5.340 | -1.345 | 2.540  | 1.345  |
| PKN1     | 22.940 | 1.238   | 26.669 | -0.101 | 1.339  | 0.395  | -1.339 |
| PSEN1    | 24.909 | -0.731  | 28.668 | -2.100 | 1.368  | 0.387  | -1.368 |
| PSEN2    | 26.583 | -2.405  | 31.133 | -4.565 | 2.160  | 0.224  | -2.160 |
| SERPINA3 | 26.133 | -1.955  | 23.956 | 2.612  | -4.567 | 23.709 | 4.567  |
| SNCA     | 23.510 | 0.669   | 26.813 | -0.245 | 0.914  | 0.531  | -0.914 |
| SOAT1    | 25.510 | -1.332  | 30.352 | -3.784 | 2.452  | 0.183  | -2.452 |
| SOD2     | 21.755 | 2.423   | 24.590 | 1.978  | 0.445  | 0.735  | -0.445 |
| CAPNS2   | 23.103 | 1.075   | 31.733 | -5.165 | 6.240  | 0.013  | -6.240 |

|         |        |         |        |         |        |       |         |
|---------|--------|---------|--------|---------|--------|-------|---------|
| TNF     | 30.548 | -6.370  | 34.430 | -7.862  | 1.492  | 0.356 | -1.492  |
| UCHL1   | 21.707 | 2.471   | 26.828 | -0.259  | 2.730  | 0.151 | -2.730  |
| VSNL1   | 27.649 | -3.471  | 33.327 | -6.759  | 3.288  | 0.102 | -3.288  |
| GAL     | 29.142 | -4.964  | 30.895 | -4.326  | -0.637 | 1.555 | 0.637   |
| ACHE    | 24.642 | -0.464  | 29.944 | -3.375  | 2.912  | 0.133 | -2.912  |
| AGER    | 27.959 | -3.780  | 33.062 | -6.494  | 2.714  | 0.152 | -2.714  |
| NAE1    | 26.691 | -2.513  | 30.334 | -3.765  | 1.252  | 0.420 | -1.252  |
| BCHE    | 28.987 | -4.809  | 35.674 | -9.106  | 4.297  | 0.051 | -4.297  |
| CAPNS1  | 20.366 | 3.812   | 25.683 | 0.886   | 2.927  | 0.132 | -2.927  |
| CHRNA7  | 28.672 | -4.493  | 30.743 | -4.174  | -0.319 | 1.247 | 0.319   |
| CSNK1D  | 21.767 | 2.411   | 26.147 | 0.421   | 1.990  | 0.252 | -1.990  |
| CYP46A1 | 35.514 | -11.335 | 41.000 | -14.432 | 3.096  | 0.117 | -3.096  |
| GAP43   | 24.747 | -0.568  | 28.034 | -1.466  | 0.898  | 0.537 | -0.898  |
| GRIN2C  | 27.815 | -3.637  | 41.000 | -14.432 | 10.795 | 0.001 | -10.795 |
| SLC30A3 | 33.262 | -9.083  | 41.000 | -14.432 | 5.348  | 0.025 | -5.348  |
| ST6GAL1 | 28.664 | -4.486  | 32.496 | -5.928  | 1.442  | 0.368 | -1.442  |
| UBQLN1  | 22.741 | 1.438   | 28.783 | -2.215  | 3.653  | 0.080 | -3.653  |
